# Supplementary material
Source: PubMed Central journal article supplement (PMC8361461)
Supplement: advancesADV2021004554-suppl1.pdf [file advancesADV2021004554-suppl1.pdf]

# Clonal Hematopoiesis in Patients Receiving Chimeric Antigen Receptor T-Cell Therapy

## Supplemental Material

### **Supplemental Figures**

|                                                                                                                        |   |
|------------------------------------------------------------------------------------------------------------------------|---|
| Supplemental Figure 1. Clonal Hematopoiesis Characteristics in CAR T-cell Cohort                                       | 1 |
| Supplemental Figure 2. Cytokine Release Syndrome in CAR T-cell Cohort                                                  | 2 |
| Supplemental Figure 3. Relapse Free and Overall Survival in Cohort Stratified by Age Greater or Less than 60 Years Old | 3 |

### **Supplemental Tables**

|                                                                                                      |     |
|------------------------------------------------------------------------------------------------------|-----|
| Supplemental Table 1. Genes Sequenced for Determination of Clonal Hematopoiesis                      | 4   |
| Supplemental Table 2. Cohort Characteristics                                                         | 5   |
| Supplemental Table 3. Clonal Hematopoietic Mutations Identified in Cohort                            | 6-9 |
| Supplemental Table 4. Association between Clonal Hematopoiesis and Toxicity After CAR T-Cell Therapy | 10  |

### **Supplemental Methods**

11

**Supplemental Figure 1. Clonal Hematopoiesis Characteristics in CAR T-cell Cohort.**

**A)** The age distribution of patients in the cohort.

**B)** The maximum variant allele frequency identified in each patient with clonal hematopoiesis plotted for different age groups. The horizontal lines represent the medians in each age strata.

**C)** A co-mutation plot for all individuals with any clonal hematopoietic mutation identified. Each column is a patient and each row is a gene. The top two rows represent the total number of mutations (MaxNum) and maximum variant allele fraction (MAXVAF) identified in each patient with blue representing fewer and red representing more mutations.

**D)** Distribution of the number of mutations identified in patients in the cohort.

**E)** Distribution of the types of single nucleotide variants (SNVs) identified in the cohort.

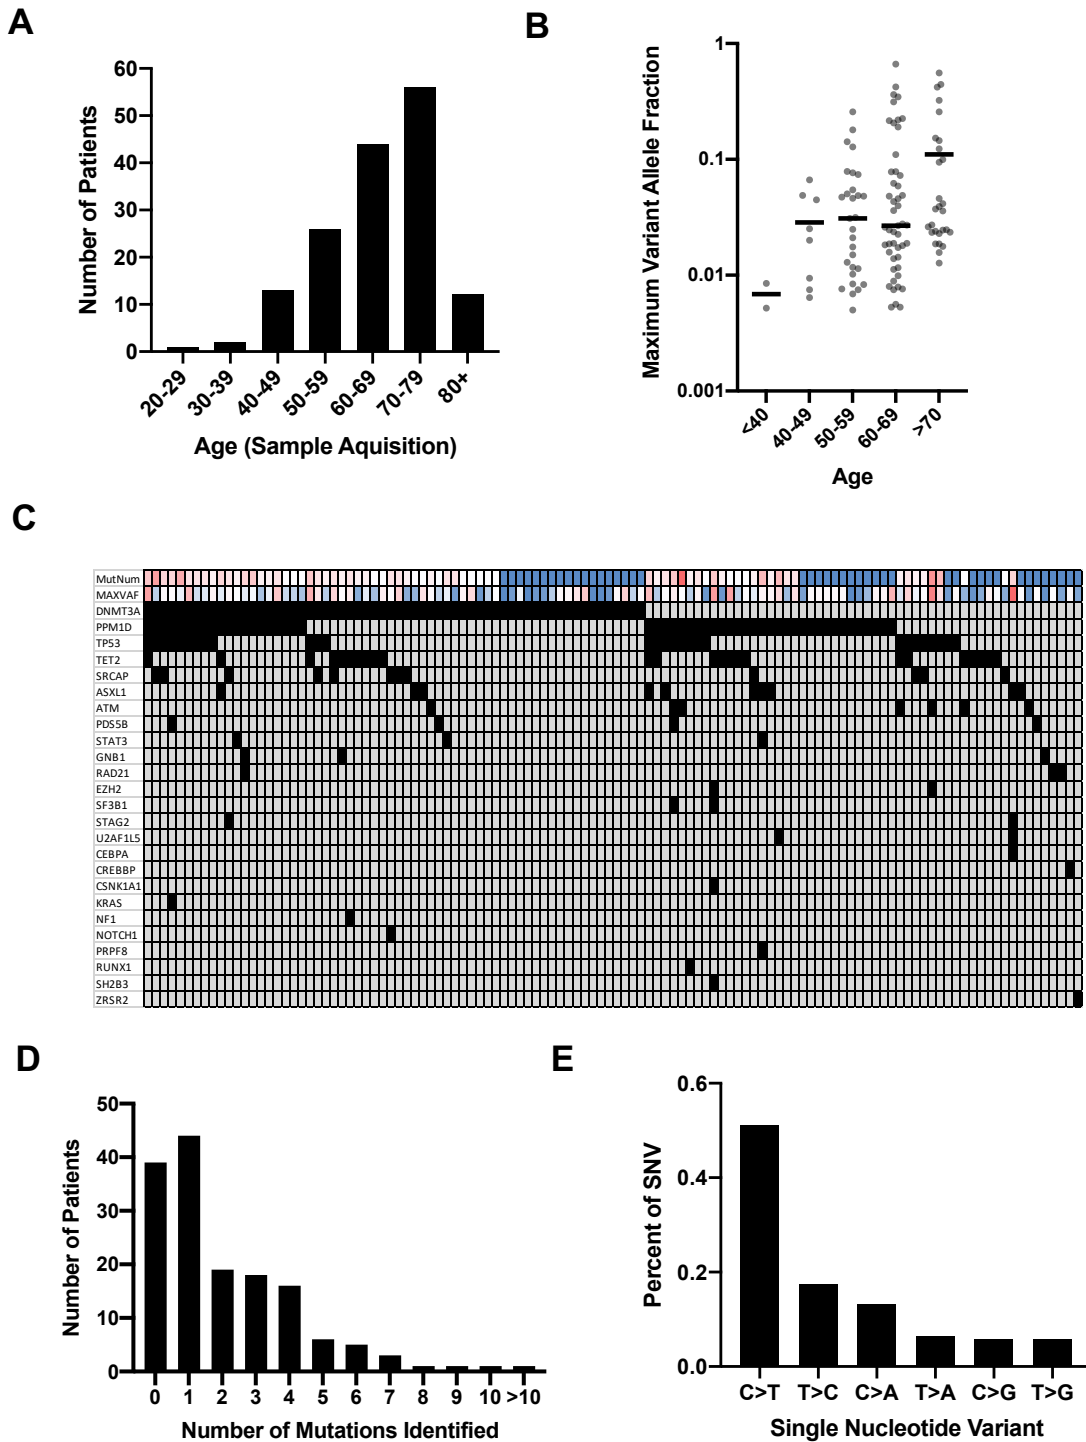

## Supplemental Figure 2. Cytokine Release Syndrome in CAR T-cell Cohort.

- A)** The distribution of cytokine release syndrome (CRS) grades per the American Society for Transplantation and Cellular Therapy (ASTCT) grading system across the cohort.
- B)** Maximum high sensitivity C-reactive protein (hsCRP) level in each patient stratified by maximum CRS grade recorded.
- C)** Maximum ferritin level in each patient stratified by maximum CRS grade recorded.
- D)** Maximum interleukin-6 (IL-6) level in each patient stratified by maximum CRS grade recorded.
- E)** Maximum ferritin, IL-6, and hsCRP levels for each patient stratified by absence (variant allele fraction [VAF] < 0.02) or presence (VAF > 0.02) of clonal hematopoiesis. Shown are median and interquartile range for (B)-(E).

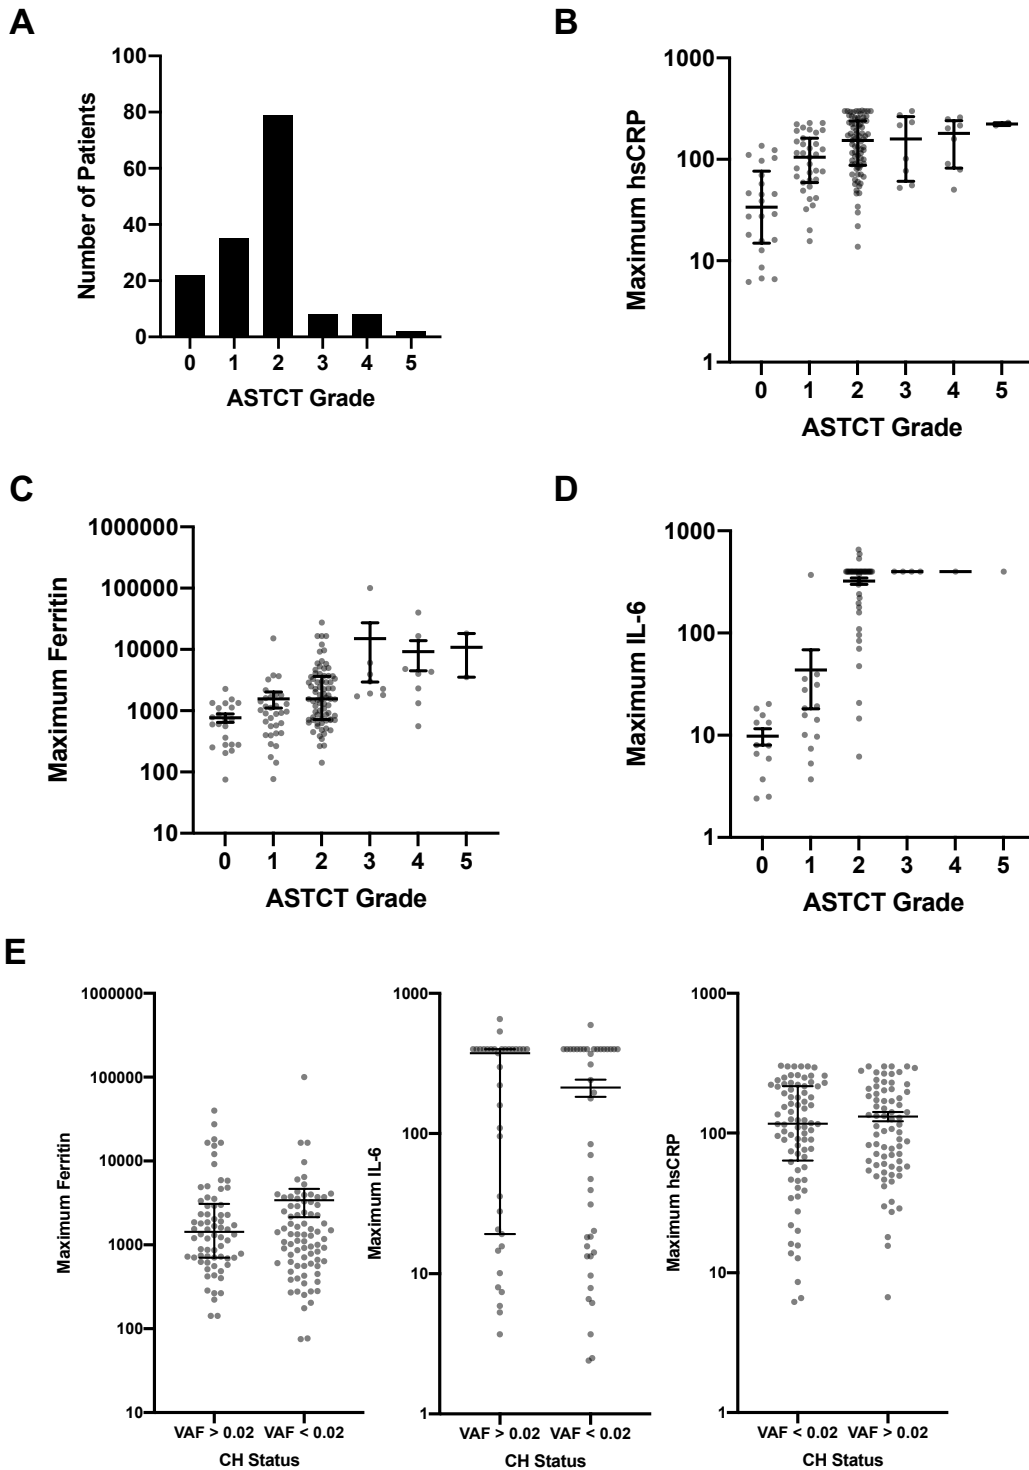

**Supplemental Figure 3. Relapse Free and Overall Survival in Cohort Stratified by Age Greater or Less than 60 Years Old.**

**A)** Progression-free survival of patients younger than 60 years old with Non-Hodgkin lymphoma stratified by absence (red) or presence (orange) of clonal hematopoiesis with a variant allele fraction (VAF) greater than or equal to 0.02. A log-rank test was performed to compare survival curves.

**B)** Overall survival of patients younger than 60 years old with Non-Hodgkin lymphoma stratified by absence (red) or presence (orange) of clonal hematopoiesis with a variant allele fraction (VAF) greater than or equal to 0.02. A log-rank test was performed to compare survival curves.

**C)** Progression-free survival of patients older than 60 years old with Non-Hodgkin lymphoma stratified by absence (red) or presence (orange) of clonal hematopoiesis with a variant allele fraction (VAF) greater than or equal to 0.02. A log-rank test was performed to compare survival curves.

**D)** Overall survival of patients older than 60 years old with Non-Hodgkin lymphoma stratified by absence (red) or presence (orange) of clonal hematopoiesis with a variant allele fraction (VAF) greater than or equal to 0.02. A log-rank test was performed to compare survival curves.

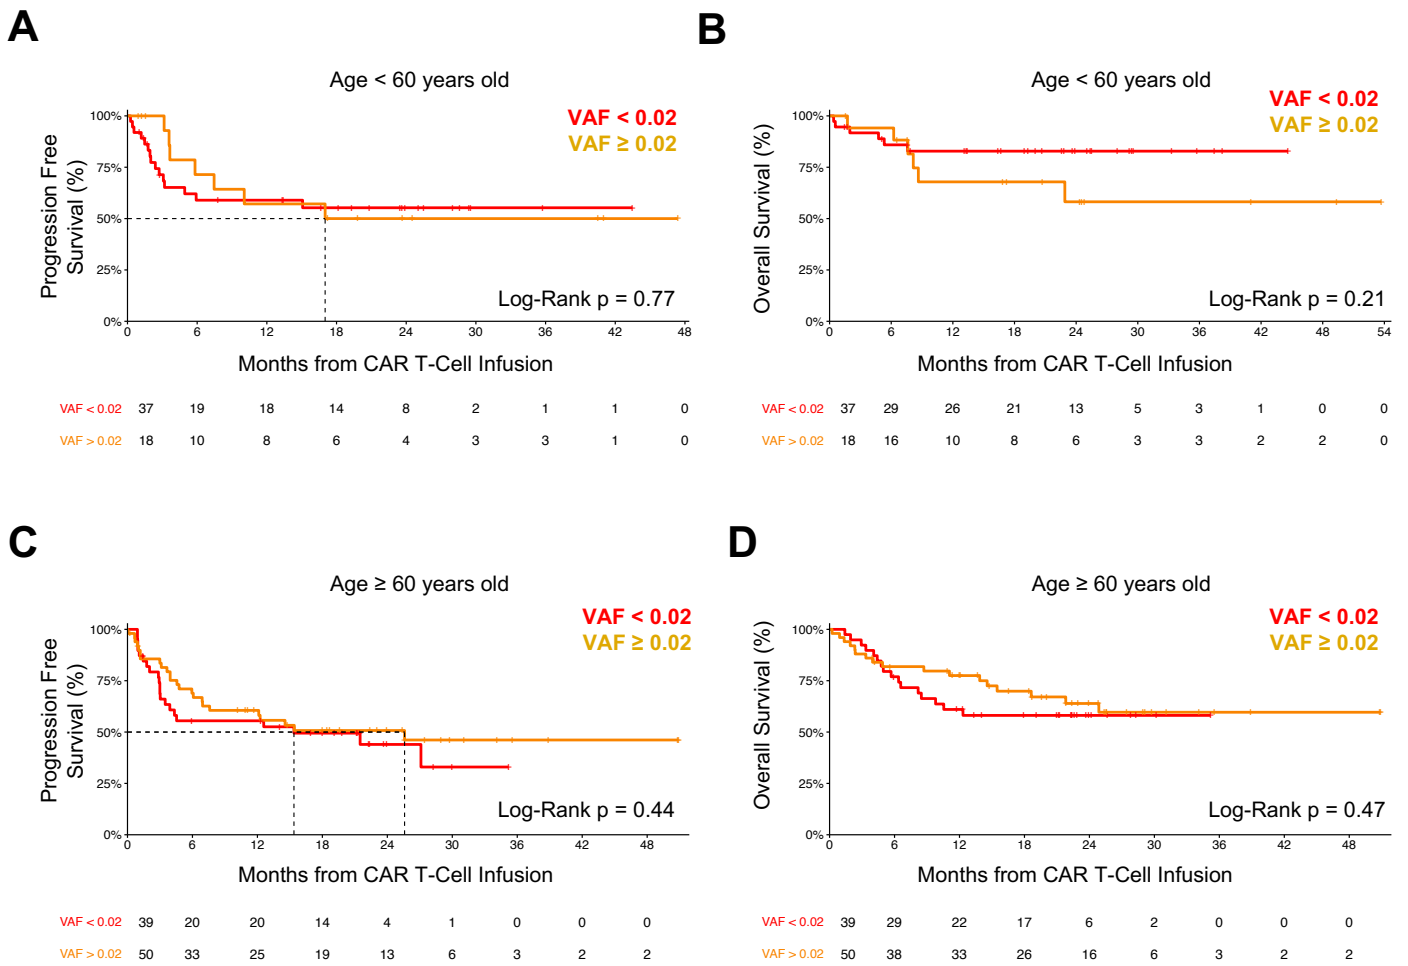

**Supplemental Table 1. Genes Sequenced for Determination of Clonal Hematopoiesis.**

|          |         |        |         |        |
|----------|---------|--------|---------|--------|
| ASXL1    | CSNK1A5 | IDH2   | PIGA    | SRSF2  |
| ATM      | CSNK1A6 | IKZF1  | PIGT    | STAG1  |
| ATRX     | CSNK1A7 | JAK2   | PPM1D   | STAG2  |
| B2M      | CSNK1A8 | JAK3   | PRPF40B | STAT3  |
| BCOR     | CSNK1A9 | KIT    | PRPF8   | STAT5B |
| BCORL1   | CTCF    | KRAS   | PTEN    | TERC   |
| BRAF     | CUX1    | LUC7L2 | PTPN11  | TERT   |
| BRCC3    | DDX41   | MIR142 | RAD21   | TET2   |
| CALR     | DNMT3A  | MPL    | RIT1    | TP53   |
| CBL      | EP300   | MRE11A | RPL11   | U2AF1  |
| CBLB     | ETNK1   | MYC    | RPS7    | U2AF2  |
| CEBPA    | ETV6    | MYD88  | RUNX1   | VPS45  |
| CREBBP   | EZH2    | MYH9   | SETBP1  | WT1    |
| CSF1R    | FANCL   | NF1    | SETD2   | YLPM1  |
| CSF3R    | FLT3    | NOTCH1 | SF1     | ZBTB33 |
| CSNK1A1  | FP SNP  | NOTCH2 | SF3A1   | ZNF318 |
| CSNK1A10 | GATA1   | NPM1   | SF3B1   | ZRSR2  |
| CSNK1A11 | GATA2   | NRAS   | SH2B3   |        |
| CSNK1A2  | GNAS    | PDS5B  | SMC1A   |        |
| CSNK1A3  | GNB1    | PHF6   | SMC3    |        |
| CSNK1A4  | IDH1    | PHIP   | SRCAP   |        |

**Supplemental Table 2. Cohort Characteristics**

|                                                    |                   |
|----------------------------------------------------|-------------------|
| <b>Total Patients and CAR T-Cell Treatment (n)</b> | <b>154</b>        |
| Non-Hodgkin Lymphoma                               | 144               |
| Multiple Myeloma                                   | 10                |
| <b>Age (median, range)</b>                         | <b>63 (24-83)</b> |
| <b>Gender (n,%)</b>                                |                   |
| Male                                               | 91 (59)           |
| Female                                             | 63 (41)           |
| <b>Best Overall Response (n,%)</b>                 |                   |
| Complete Remission                                 | 100 (65)          |
| Partial Remission                                  | 32 (21)           |
| Stable Disease                                     | 5 (3)             |
| Progressive Disease                                | 17 (11)           |
| <b>Prior Lines of Treatment (n,%)</b>              |                   |
| 1-2                                                | 71 (46)           |
| 3-5                                                | 67 (44)           |
| 6-10                                               | 16 (10)           |
| <b>Prior Stem Cell Transplant (n,%)</b>            |                   |
| Autologous                                         | 41 (27)           |
| Allogeneic                                         | 5 (3)             |
| <b>CRS Grade (n,%)</b>                             |                   |
| 0                                                  | 22 (14)           |
| 1-2                                                | 114 (74)          |
| 3-4                                                | 16 (10)           |
| 5                                                  | 2 (1)             |
| <b>Treatment for CRS (n,%)</b>                     |                   |
| Tocilizumab                                        | 83 (54)           |
| Steroids                                           | 59 (38)           |









**Supplemental Table 3. Clonal Hematopoietic Mutations Identified in Cohort (continued).**

| chrom | pos_start | pos_end   | ref | var | gene    | cdna             | aa           | result                 | reads1 | reads2 | var_freq |
|-------|-----------|-----------|-----|-----|---------|------------------|--------------|------------------------|--------|--------|----------|
| 4     | 106190860 | 106190860 | C   | T   | TET2    | c.C4138T         | p.H1380Y     | nonsynonymous SNV      | 808    | 170    | 0.1738   |
| 4     | 106180774 | 106180774 | A   | T   | TET2    | c.3804-2A>T      |              | splicing               | 737    | 13     | 0.0173   |
| 4     | 106156651 | 106156651 | -   | TT  | TET2    | c.1552_1553insTT | p.I518fs     | frameshift insertion   | 747    | 341    | 0.3131   |
| 4     | 106197002 | 106197002 | G   | -   | TET2    | c.5335delG       | p.A1779fs    | frameshift deletion    | 447    | 12     | 0.0261   |
| 4     | 106157620 | 106157620 | G   | -   | TET2    | c.2521delG       | p.V841fs     | frameshift deletion    | 991    | 78     | 0.073    |
| 4     | 106156025 | 106156025 | -   | A   | TET2    | c.927dupA        | p.A309fs     | frameshift insertion   | 1053   | 130    | 0.1099   |
| 4     | 106164769 | 106164769 | G   | A   | TET2    | c.G3637A         | p.V1213M     | nonsynonymous SNV      | 1076   | 7      | 0.0065   |
| 4     | 106155938 | 106155938 | -   | T   | TET2    | c.840dupT        | p.S280fs     | frameshift insertion   | 1489   | 14     | 0.0093   |
| 4     | 106164794 | 106164794 | G   | A   | TET2    | c.G3662A         | p.C1221Y     | nonsynonymous SNV      | 1186   | 70     | 0.0557   |
| 4     | 106194066 | 106194066 | C   | T   | TET2    | c.C4528T         | p.Q1510X     | stopgain               | 652    | 93     | 0.1248   |
| 4     | 106197208 | 106197208 | G   | A   | TET2    | c.G5541A         | p.W1847X     | stopgain               | 718    | 519    | 0.4196   |
| 4     | 106197244 | 106197244 | T   | -   | TET2    | c.5577delT       | p.I1859fs    | frameshift deletion    | 1260   | 9      | 0.0071   |
| 4     | 106157139 | 106157139 | A   | -   | TET2    | c.2040delA       | p.R680fs     | frameshift deletion    | 611    | 44     | 0.0672   |
| 4     | 106190795 | 106190795 | G   | C   | TET2    | c.G4073C         | p.C1358S     | nonsynonymous SNV      | 781    | 6      | 0.0076   |
| 4     | 106197366 | 106197366 | T   | C   | TET2    | c.T5699C         | p.V1900A     | nonsynonymous SNV      | 1446   | 22     | 0.015    |
| 4     | 106156932 | 106156932 | G   | -   | TET2    | c.1833delG       | p.M611fs     | frameshift deletion    | 851    | 10     | 0.0116   |
| 4     | 106197248 | 106197248 | G   | T   | TET2    | c.G5581T         | p.G1861X     | stopgain               | 1267   | 37     | 0.0284   |
| 4     | 106156747 | 106156747 | C   | T   | TET2    | c.C1648T         | p.R550X      | stopgain               | 1070   | 6      | 0.0056   |
| 4     | 106157371 | 106157371 | C   | T   | TET2    | c.C2272T         | p.Q758X      | stopgain               | 778    | 10     | 0.0127   |
| 4     | 106197013 | 106197017 | O   | -   | TET2    | c.5346_5350del   | p.L1782fs    | frameshift deletion    | 1152   | 12     | 0.0103   |
| 17    | 7578235   | 7578235   | T   | C   | TP53    | c.A614G          | p.Y205C      | nonsynonymous SNV      | 654    | 59     | 0.0827   |
| 17    | 7578457   | 7578457   | C   | T   | TP53    | c.G473A          | p.R158H      | nonsynonymous SNV      | 677    | 84     | 0.1104   |
| 17    | 7578191   | 7578191   | A   | G   | TP53    | c.T658C          | p.Y220H      | nonsynonymous SNV      | 427    | 102    | 0.1928   |
| 17    | 7577548   | 7577548   | C   | T   | TP53    | c.G733A          | p.G245S      | nonsynonymous SNV      | 1089   | 20     | 0.018    |
| 17    | 7578518   | 7578518   | C   | T   | TP53    | c.G412A          | p.A138T      | nonsynonymous SNV      | 830    | 5      | 0.006    |
| 17    | 7577539   | 7577539   | G   | A   | TP53    | c.C742T          | p.R248W      | nonsynonymous SNV      | 753    | 19     | 0.0246   |
| 17    | 7578406   | 7578406   | C   | T   | TP53    | c.G524A          | p.R175H      | nonsynonymous SNV      | 1356   | 150    | 0.0996   |
| 17    | 7577094   | 7577094   | G   | A   | TP53    | c.C844T          | p.R282W      | nonsynonymous SNV      | 917    | 5      | 0.0054   |
| 17    | 7577543   | 7577543   | C   | T   | TP53    | c.G738A          | p.M246I      | nonsynonymous SNV      | 950    | 8      | 0.0084   |
| 17    | 7577115   | 7577115   | A   | C   | TP53    | c.T823G          | p.C275G      | nonsynonymous SNV      | 1461   | 11     | 0.0075   |
| 17    | 7578403   | 7578403   | C   | A   | TP53    | c.G527T          | p.C176F      | nonsynonymous SNV      | 1672   | 13     | 0.0077   |
| 17    | 7577568   | 7577568   | C   | T   | TP53    | c.G713A          | p.C238Y      | nonsynonymous SNV      | 648    | 5      | 0.0077   |
| 17    | 7578475   | 7578475   | G   | C   | TP53    | c.C455G          | p.P152R      | nonsynonymous SNV      | 906    | 6      | 0.0066   |
| 17    | 7577094   | 7577094   | G   | A   | TP53    | c.C844T          | p.R282W      | nonsynonymous SNV      | 963    | 11     | 0.0113   |
| 17    | 7577120   | 7577120   | C   | T   | TP53    | c.G818A          | p.R273H      | nonsynonymous SNV      | 981    | 25     | 0.0249   |
| 17    | 7577138   | 7577138   | C   | G   | TP53    | c.G800C          | p.R267P      | nonsynonymous SNV      | 1190   | 59     | 0.0472   |
| 17    | 7578236   | 7578236   | A   | G   | TP53    | c.T613C          | p.Y205H      | nonsynonymous SNV      | 997    | 5      | 0.005    |
| 17    | 7577121   | 7577121   | G   | T   | TP53    | c.C817A          | p.R273S      | nonsynonymous SNV      | 1048   | 8      | 0.0076   |
| 17    | 7578191   | 7578191   | A   | T   | TP53    | c.T658A          | p.Y220N      | nonsynonymous SNV      | 738    | 8      | 0.0107   |
| 17    | 7578190   | 7578190   | T   | C   | TP53    | c.A659G          | p.Y220C      | nonsynonymous SNV      | 720    | 20     | 0.027    |
| 17    | 7577120   | 7577120   | C   | T   | TP53    | c.G818A          | p.R273H      | nonsynonymous SNV      | 1180   | 19     | 0.0158   |
| 17    | 7577532   | 7577532   | G   | A   | TP53    | c.C749T          | p.P250L      | nonsynonymous SNV      | 948    | 19     | 0.0196   |
| 17    | 7577022   | 7577022   | G   | A   | TP53    | c.C916T          | p.R306X      | stopgain               | 1063   | 14     | 0.013    |
| 17    | 7577559   | 7577559   | G   | A   | TP53    | c.C722T          | p.S241F      | nonsynonymous SNV      | 767    | 29     | 0.0364   |
| 17    | 7576865   | 7576865   | A   | T   | TP53    | c.T981A          | p.Y327X      | stopgain               | 676    | 95     | 0.1232   |
| 17    | 7577120   | 7577120   | C   | T   | TP53    | c.G818A          | p.R273H      | nonsynonymous SNV      | 985    | 27     | 0.0267   |
| 17    | 7577505   | 7577505   | T   | A   | TP53    | c.A776T          | p.D259V      | nonsynonymous SNV      | 643    | 6      | 0.0092   |
| 17    | 7578535   | 7578535   | T   | C   | TP53    | c.A395G          | p.K132R      | nonsynonymous SNV      | 1023   | 7      | 0.0068   |
| 17    | 7577124   | 7577124   | C   | A   | TP53    | c.G814T          | p.V272L      | nonsynonymous SNV      | 934    | 9      | 0.0095   |
| 17    | 7578550   | 7578550   | G   | A   | TP53    | c.C380T          | p.S127F      | nonsynonymous SNV      | 860    | 24     | 0.0271   |
| 17    | 7578442   | 7578442   | T   | C   | TP53    | c.A488G          | p.Y163C      | nonsynonymous SNV      | 1248   | 35     | 0.0273   |
| 17    | 7577574   | 7577574   | T   | C   | TP53    | c.A707G          | p.Y236C      | nonsynonymous SNV      | 689    | 54     | 0.0727   |
| 17    | 7577108   | 7577108   | C   | A   | TP53    | c.G830T          | p.C277F      | nonsynonymous SNV      | 909    | 154    | 0.1449   |
| 17    | 7578406   | 7578406   | C   | T   | TP53    | c.G524A          | p.R175H      | nonsynonymous SNV      | 1499   | 8      | 0.0053   |
| 17    | 7577098   | 7577100   | O   | -   | TP53    | c.838_840del     | p.280_280del | nonframeshift deletion | 1286   | 18     | 0.0138   |
| 17    | 7577580   | 7577580   | T   | C   | TP53    | c.A701G          | p.Y234C      | nonsynonymous SNV      | 925    | 8      | 0.0086   |
| 17    | 7577550   | 7577550   | C   | T   | TP53    | c.G731A          | p.G244D      | nonsynonymous SNV      | 796    | 12     | 0.0149   |
| 17    | 7577559   | 7577559   | G   | A   | TP53    | c.C722T          | p.S241F      | nonsynonymous SNV      | 1206   | 10     | 0.0082   |
| 17    | 7578442   | 7578442   | T   | C   | TP53    | c.A488G          | p.Y163C      | nonsynonymous SNV      | 1910   | 10     | 0.0052   |
| 17    | 7578503   | 7578503   | C   | T   | TP53    | c.G427A          | p.V143M      | nonsynonymous SNV      | 1749   | 14     | 0.0079   |
| 17    | 7578449   | 7578449   | C   | T   | TP53    | c.G481A          | p.A161T      | nonsynonymous SNV      | 1445   | 9      | 0.0062   |
| 17    | 7577114   | 7577114   | C   | T   | TP53    | c.G824A          | p.C275Y      | nonsynonymous SNV      | 1055   | 10     | 0.0094   |
| 17    | 7578191   | 7578191   | A   | G   | TP53    | c.T658C          | p.Y220H      | nonsynonymous SNV      | 721    | 13     | 0.0177   |
| 17    | 7574034   | 7574034   | C   | G   | TP53    | c.877-1G>C       |              | splicing               | 727    | 17     | 0.0228   |
| 17    | 7578479   | 7578479   | G   | A   | TP53    | c.C451T          | p.P151S      | nonsynonymous SNV      | 1340   | 45     | 0.0325   |
| 17    | 7578190   | 7578190   | T   | C   | TP53    | c.A659G          | p.Y220C      | nonsynonymous SNV      | 674    | 60     | 0.0817   |
| 17    | 7579447   | 7579447   | A   | -   | TP53    | c.240delT        | p.P80fs      | frameshift deletion    | 1294   | 119    | 0.0842   |
| 17    | 7577570   | 7577570   | C   | T   | TP53    | c.G711A          | p.M237I      | nonsynonymous SNV      | 305    | 385    | 0.558    |
| 17    | 7577082   | 7577082   | C   | T   | TP53    | c.G856A          | p.E286K      | nonsynonymous SNV      | 1296   | 18     | 0.0137   |
| 17    | 7579717   | 7579717   | G   | C   | TP53    | c.C79G           | p.P27A       | nonsynonymous SNV      | 553    | 5      | 0.009    |
| 17    | 7578555   | 7578555   | C   | T   | TP53    | c.259-1G>A       |              | splicing               | 625    | 299    | 0.3236   |
| 21    | 44514777  | 44514777  | T   | C   | U2AF1L5 | c.A470G          | p.Q157R      | nonsynonymous SNV      | 1047   | 11     | 0.0104   |
| 21    | 44514777  | 44514777  | T   | G   | U2AF1L5 | c.A470C          | p.Q157P      | nonsynonymous SNV      | 464    | 276    | 0.373    |
| X     | 15841102  | 15841102  | G   | T   | ZRSR2   | c.G1186T         | p.E396X      | stopgain               | 585    | 6      | 0.0102   |

**Supplemental Table 4. Association between Clonal Hematopoiesis and Toxicity After CAR T-Cell Therapy.**

**A)** ASTCT cytokine release syndrome (CRS) grade stratified by age and CHIP status across entire cohort.

**B)** Clinical evidence of neurotoxicity stratified by age and CHIP status across in non-Hodgkin Lymphoma (NHL) patients.

**A**

|                     | CH Status  | Total Patients | ASTCT CRS Score |                 | p-value* |
|---------------------|------------|----------------|-----------------|-----------------|----------|
|                     |            |                | Grade < 2 # (%) | Grade ≥ 2 # (%) |          |
| <b>All Patients</b> | VAF < 0.02 | 80             | 32 (40.0)       | 48 (60.0)       | 0.5      |
|                     | VAF ≥ 0.02 | 74             | 25 (33.8)       | 49 (66.2)       |          |
| <b>Age &lt; 60</b>  | VAF < 0.02 | 40             | 21 (52.5)       | 19 (47.5)       | 0.032    |
|                     | VAF ≥ 0.02 | 22             | 5 (22.7)        | 17 (77.3)       |          |
| <b>Age ≥ 60</b>     | VAF < 0.02 | 40             | 11 (27.5)       | 29 (72.5)       | 0.37     |
|                     | VAF ≥ 0.02 | 52             | 20 (38.5)       | 32 (61.5)       |          |

\* p-values were calculated using a Fisher's exact test

**B**

|                         | CH Status  | Total Patients | Neurotoxicity |           | p-value* |
|-------------------------|------------|----------------|---------------|-----------|----------|
|                         |            |                | No # (%)      | Yes # (%) |          |
| <b>All NHL Patients</b> | VAF < 0.02 | 76             | 43 (56.6)     | 33 (43.4) | 0.066    |
|                         | VAF > 0.02 | 67             | 27 (40.3)     | 40 (59.7) |          |
| <b>NHL Age &lt; 60</b>  | VAF < 0.02 | 37             | 23 (62.2)     | 14 (37.8) | 0.56     |
|                         | VAF > 0.02 | 18             | 9 (50.0)      | 9 (50.0)  |          |
| <b>NHL Age &gt; 60</b>  | VAF < 0.02 | 39             | 20 (51.3)     | 19 (48.7) | 0.20     |
|                         | VAF > 0.02 | 49             | 18 (36.7)     | 31 (63.3) |          |

\* p-values were calculated using a Fisher's exact test

## **Supplemental Methods**

### **DNA Sequencing and Variant Calling**

Following hybridization of sheared genomic DNA, we generated libraries tagged with duplex unique molecular identifiers using a custom bait set from Twist Bioscience (San Francisco, CA) targeting 101 genes recurrently mutated in CH (**Supplemental Table 1**). The bait set targeted regions of the genes previously shown to harbor recurrent, pathogenic variants (all regions targeted by the bait set will be made available upon request). Following UMI deduplication and alignment, we performed variant calling using Varscan version 2.2.3 and annotation using Annovar (April 2017 build). We classified variants as CH based on accepted criteria for pathogenicity and included variants with at least 5 supporting consensus reads in final analysis.<sup>16,17</sup>

### **Statistical Methods**

Exploratory endpoints included serum levels of high sensitivity C-reactive protein (hsCRP), ferritin, and interleukin-6 (IL-6) between groups with and without CH VAF > 0.02, stratified by age above or below 60. PFS and OS comparisons were performed using the log-rank test, comparisons of rates of best overall response, CRS, and frequency of CH between this and previously published cohorts were performed using Fisher's exact tests, and comparisons of continuous variables between groups (such as cytokine levels) were performed using Mann-Whitney U tests. Differences between groups were considered statistically significant at p-values < 0.05. All analyses were performed and the results plotted using R (v4.0.0) or PRISM (v9.0.0)
