# Supplementary material
Source: PubMed Central journal article supplement (PMC8361461)
Supplement: advancesADV2021004554-suppl2.pdf [file advancesADV2021004554-suppl2.pdf]

| Chr   | Start   | End     | Gene  |
|-------|---------|---------|-------|
| chr5  | 1253275 | 1253952 | TERT  |
| chr5  | 1254476 | 1254626 | TERT  |
| chr5  | 1255395 | 1255532 | TERT  |
| chr5  | 1258706 | 1258780 | TERT  |
| chr5  | 1260582 | 1260721 | TERT  |
| chr5  | 1264512 | 1264713 | TERT  |
| chr5  | 1266572 | 1266656 | TERT  |
| chr5  | 1268628 | 1268754 | TERT  |
| chr5  | 1271227 | 1271325 | TERT  |
| chr5  | 1272293 | 1272401 | TERT  |
| chr5  | 1278749 | 1278917 | TERT  |
| chr5  | 1279399 | 1279591 | TERT  |
| chr5  | 1280266 | 1280459 | TERT  |
| chr5  | 1282537 | 1282745 | TERT  |
| chr5  | 1293421 | 1294787 | TERT  |
| chr5  | 1294879 | 1295498 | TERT  |
| chr17 | 1554089 | 1554256 | PRPF8 |
| chr17 | 1554395 | 1554610 | PRPF8 |
| chr17 | 1554701 | 1554853 | PRPF8 |
| chr17 | 1554935 | 1555088 | PRPF8 |
| chr17 | 1556829 | 1556983 | PRPF8 |
| chr17 | 1557064 | 1557316 | PRPF8 |
| chr17 | 1558637 | 1558843 | PRPF8 |
| chr17 | 1559679 | 1559865 | PRPF8 |
| chr17 | 1559935 | 1560061 | PRPF8 |
| chr17 | 1561540 | 1561681 | PRPF8 |
| chr17 | 1561813 | 1562063 | PRPF8 |
| chr17 | 1562644 | 1562848 | PRPF8 |
| chr17 | 1563128 | 1563301 | PRPF8 |
| chr17 | 1563719 | 1563878 | PRPF8 |
| chr17 | 1563985 | 1564127 | PRPF8 |
| chr17 | 1564280 | 1564462 | PRPF8 |
| chr17 | 1564558 | 1564706 | PRPF8 |
| chr17 | 1564898 | 1565090 | PRPF8 |
| chr17 | 1565193 | 1565453 | PRPF8 |
| chr17 | 1576368 | 1576497 | PRPF8 |
| chr17 | 1576644 | 1576867 | PRPF8 |
| chr17 | 1577033 | 1577192 | PRPF8 |
| chr17 | 1577729 | 1577980 | PRPF8 |
| chr17 | 1578439 | 1578639 | PRPF8 |
| chr17 | 1578907 | 1579112 | PRPF8 |
| chr17 | 1579215 | 1579354 | PRPF8 |

|       |         |         |        |
|-------|---------|---------|--------|
| chr17 | 1579494 | 1579670 | PRPF8  |
| chr17 | 1579792 | 1580011 | PRPF8  |
| chr17 | 1580263 | 1580472 | PRPF8  |
| chr17 | 1580852 | 1580994 | PRPF8  |
| chr17 | 1581805 | 1581952 | PRPF8  |
| chr17 | 1582049 | 1582181 | PRPF8  |
| chr17 | 1582304 | 1582506 | PRPF8  |
| chr17 | 1582578 | 1582710 | PRPF8  |
| chr17 | 1582896 | 1583099 | PRPF8  |
| chr17 | 1584013 | 1584131 | PRPF8  |
| chr17 | 1584216 | 1584354 | PRPF8  |
| chr17 | 1584765 | 1584990 | PRPF8  |
| chr17 | 1585107 | 1585338 | PRPF8  |
| chr17 | 1585416 | 1585593 | PRPF8  |
| chr17 | 1586820 | 1587001 | PRPF8  |
| chr17 | 1587759 | 1587871 | PRPF8  |
| chr1  | 1737902 | 1737983 | GNB1   |
| chr1  | 1747183 | 1747307 | GNB1   |
| chr2  | 3623193 | 3623280 | RPS7   |
| chr2  | 3623400 | 3623484 | RPS7   |
| chr2  | 3624070 | 3624226 | RPS7   |
| chr2  | 3625293 | 3625370 | RPS7   |
| chr2  | 3627693 | 3627856 | RPS7   |
| chr2  | 3628388 | 3628478 | RPS7   |
| chr16 | 3777712 | 3779881 | CREBBP |
| chr16 | 3781186 | 3781480 | CREBBP |
| chr16 | 3781770 | 3781944 | CREBBP |
| chr16 | 3786030 | 3786210 | CREBBP |
| chr16 | 3786644 | 3786822 | CREBBP |
| chr16 | 3788553 | 3788679 | CREBBP |
| chr16 | 3789572 | 3789731 | CREBBP |
| chr16 | 3790393 | 3790556 | CREBBP |
| chr16 | 3794888 | 3794968 | CREBBP |
| chr16 | 3795271 | 3795361 | CREBBP |
| chr16 | 3799621 | 3799690 | CREBBP |
| chr16 | 3801720 | 3801813 | CREBBP |
| chr16 | 3807282 | 3807383 | CREBBP |
| chr16 | 3807803 | 3808055 | CREBBP |
| chr16 | 3808848 | 3808979 | CREBBP |
| chr16 | 3817714 | 3817916 | CREBBP |
| chr16 | 3819168 | 3819360 | CREBBP |
| chr16 | 3820564 | 3820993 | CREBBP |
| chr16 | 3823745 | 3823937 | CREBBP |

|       |          |          |        |
|-------|----------|----------|--------|
| chr16 | 3824563  | 3824700  | CREBBP |
| chr16 | 3827607  | 3827664  | CREBBP |
| chr16 | 3828005  | 3828189  | CREBBP |
| chr16 | 3828694  | 3828824  | CREBBP |
| chr16 | 3830726  | 3830885  | CREBBP |
| chr16 | 3831198  | 3831313  | CREBBP |
| chr16 | 3832678  | 3832933  | CREBBP |
| chr16 | 3841975  | 3842101  | CREBBP |
| chr16 | 3843380  | 3843633  | CREBBP |
| chr16 | 3860597  | 3860786  | CREBBP |
| chr16 | 3900291  | 3901016  | CREBBP |
| chr16 | 3929826  | 3929923  | CREBBP |
| chr17 | 4172943  | 4172943  | FP SNP |
| chr17 | 4175846  | 4175846  | FP SNP |
| chr9  | 5069918  | 5070058  | JAK2   |
| chr9  | 5073691  | 5073791  | JAK2   |
| chr9  | 5078299  | 5078450  | JAK2   |
| chr7  | 6066461  | 6066461  | FP SNP |
| chr17 | 7572920  | 7573014  | TP53   |
| chr17 | 7573920  | 7574039  | TP53   |
| chr17 | 7576530  | 7576663  | TP53   |
| chr17 | 7576846  | 7576932  | TP53   |
| chr17 | 7577012  | 7577161  | TP53   |
| chr17 | 7577492  | 7577614  | TP53   |
| chr17 | 7578170  | 7578295  | TP53   |
| chr17 | 7578364  | 7578560  | TP53   |
| chr17 | 7579305  | 7579596  | TP53   |
| chr17 | 7579693  | 7579727  | TP53   |
| chr17 | 7579832  | 7579918  | TP53   |
| chr20 | 8819112  | 8819112  | FP SNP |
| chr2  | 10932207 | 10932207 | FP SNP |
| chr12 | 11803055 | 11803100 | ETV6   |
| chr12 | 11905377 | 11905519 | ETV6   |
| chr12 | 11992067 | 11992244 | ETV6   |
| chr12 | 12006354 | 12006501 | ETV6   |
| chr12 | 12022351 | 12022909 | ETV6   |
| chr12 | 12037372 | 12037527 | ETV6   |
| chr12 | 12038853 | 12038966 | ETV6   |
| chr12 | 12043868 | 12043986 | ETV6   |
| chr18 | 12718593 | 12718593 | FP SNP |
| chr12 | 12967127 | 12967127 | FP SNP |
| chr19 | 13054520 | 13054733 | CALR   |
| chrX  | 15339621 | 15339900 | PIGA   |

|       |          |          |        |
|-------|----------|----------|--------|
| chrX  | 15342780 | 15342999 | PIGA   |
| chrX  | 15343135 | 15343280 | PIGA   |
| chrX  | 15344029 | 15344174 | PIGA   |
| chrX  | 15349331 | 15350058 | PIGA   |
| chrX  | 15808612 | 15808665 | ZRSR2  |
| chrX  | 15809050 | 15809142 | ZRSR2  |
| chrX  | 15817988 | 15818082 | ZRSR2  |
| chrX  | 15821804 | 15821925 | ZRSR2  |
| chrX  | 15822227 | 15822326 | ZRSR2  |
| chrX  | 15826349 | 15826400 | ZRSR2  |
| chrX  | 15827316 | 15827447 | ZRSR2  |
| chrX  | 15833793 | 15834019 | ZRSR2  |
| chrX  | 15836703 | 15836771 | ZRSR2  |
| chrX  | 15838323 | 15838445 | ZRSR2  |
| chrX  | 15840847 | 15841371 | ZRSR2  |
| chr19 | 17937545 | 17937725 | JAK3   |
| chr19 | 17940910 | 17941033 | JAK3   |
| chr19 | 17941305 | 17941435 | JAK3   |
| chr19 | 17942030 | 17942215 | JAK3   |
| chr19 | 17942476 | 17942613 | JAK3   |
| chr19 | 17943321 | 17943523 | JAK3   |
| chr19 | 17943592 | 17943744 | JAK3   |
| chr19 | 17945373 | 17945536 | JAK3   |
| chr19 | 17945654 | 17945818 | JAK3   |
| chr19 | 17945885 | 17946030 | JAK3   |
| chr19 | 17946726 | 17946866 | JAK3   |
| chr19 | 17947931 | 17948028 | JAK3   |
| chr19 | 17948734 | 17948878 | JAK3   |
| chr19 | 17949065 | 17949205 | JAK3   |
| chr17 | 19861458 | 19861458 | FP SNP |
| chr12 | 22811941 | 22812094 | ETNK1  |
| chr1  | 24018262 | 24018320 | RPL11  |
| chr1  | 24019092 | 24019255 | RPL11  |
| chr1  | 24020290 | 24020409 | RPL11  |
| chr1  | 24021143 | 24021287 | RPL11  |
| chr1  | 24022281 | 24022404 | RPL11  |
| chr1  | 24022827 | 24022869 | RPL11  |
| chr2  | 25064193 | 25064193 | FP SNP |
| chr12 | 25368363 | 25368505 | KRAS   |
| chr12 | 25378536 | 25378718 | KRAS   |
| chr12 | 25380156 | 25380357 | KRAS   |
| chr12 | 25398196 | 25398329 | KRAS   |
| chr2  | 25457141 | 25457295 | DNMT3A |

|       |          |          |        |
|-------|----------|----------|--------|
| chr2  | 25458569 | 25458700 | DNMT3A |
| chr2  | 25459798 | 25459880 | DNMT3A |
| chr2  | 25461992 | 25462090 | DNMT3A |
| chr2  | 25463164 | 25463325 | DNMT3A |
| chr2  | 25463502 | 25463605 | DNMT3A |
| chr2  | 25464424 | 25464582 | DNMT3A |
| chr2  | 25466760 | 25466857 | DNMT3A |
| chr2  | 25467017 | 25467213 | DNMT3A |
| chr2  | 25467402 | 25467527 | DNMT3A |
| chr2  | 25468115 | 25468207 | DNMT3A |
| chr2  | 25468882 | 25468939 | DNMT3A |
| chr2  | 25469022 | 25469184 | DNMT3A |
| chr2  | 25469482 | 25469651 | DNMT3A |
| chr2  | 25469913 | 25470033 | DNMT3A |
| chr2  | 25470453 | 25470624 | DNMT3A |
| chr2  | 25470899 | 25471127 | DNMT3A |
| chr2  | 25497803 | 25497962 | DNMT3A |
| chr2  | 25498362 | 25498418 | DNMT3A |
| chr2  | 25504314 | 25505586 | DNMT3A |
| chr2  | 25523001 | 25523118 | DNMT3A |
| chr2  | 25536775 | 25536859 | DNMT3A |
| chr13 | 28592597 | 28592732 | FLT3   |
| chr13 | 28601218 | 28601384 | FLT3   |
| chr13 | 28602308 | 28602431 | FLT3   |
| chr13 | 28608017 | 28608357 | FLT3   |
| chr17 | 29422321 | 29422393 | NF1    |
| chr17 | 29482994 | 29483150 | NF1    |
| chr17 | 29486021 | 29486117 | NF1    |
| chr17 | 29490197 | 29490400 | NF1    |
| chr17 | 29496902 | 29497021 | NF1    |
| chr17 | 29508433 | 29508513 | NF1    |
| chr17 | 29508721 | 29508809 | NF1    |
| chr17 | 29509519 | 29509689 | NF1    |
| chr1  | 29519778 | 29519778 | FP SNP |
| chr17 | 29527433 | 29527619 | NF1    |
| chr17 | 29528048 | 29528183 | NF1    |
| chr17 | 29528422 | 29528509 | NF1    |
| chr17 | 29533251 | 29533395 | NF1    |
| chr1  | 29533601 | 29533601 | FP SNP |
| chr17 | 29541462 | 29541609 | NF1    |
| chr17 | 29546016 | 29546142 | NF1    |
| chr17 | 29548861 | 29548953 | NF1    |
| chr17 | 29550455 | 29550591 | NF1    |

|       |          |          |        |
|-------|----------|----------|--------|
| chr17 | 29552106 | 29552274 | NF1    |
| chr17 | 29553446 | 29553708 | NF1    |
| chr17 | 29554229 | 29554315 | NF1    |
| chr17 | 29554534 | 29554630 | NF1    |
| chr17 | 29556036 | 29556489 | NF1    |
| chr17 | 29556846 | 29556998 | NF1    |
| chr17 | 29557271 | 29557406 | NF1    |
| chr17 | 29557853 | 29557949 | NF1    |
| chr17 | 29559084 | 29559213 | NF1    |
| chr17 | 29559711 | 29559905 | NF1    |
| chr17 | 29560013 | 29560237 | NF1    |
| chr17 | 29562622 | 29562796 | NF1    |
| chr17 | 29562929 | 29563045 | NF1    |
| chr17 | 29575995 | 29576143 | NF1    |
| chr17 | 29579949 | 29580024 | NF1    |
| chr17 | 29585355 | 29585526 | NF1    |
| chr17 | 29586043 | 29586153 | NF1    |
| chr17 | 29587380 | 29587539 | NF1    |
| chr17 | 29588722 | 29588881 | NF1    |
| chr17 | 29592240 | 29592363 | NF1    |
| chr17 | 29652831 | 29653276 | NF1    |
| chr17 | 29654510 | 29654863 | NF1    |
| chr17 | 29657307 | 29657522 | NF1    |
| chr17 | 29661849 | 29662055 | NF1    |
| chr17 | 29663344 | 29663497 | NF1    |
| chr17 | 29663646 | 29663938 | NF1    |
| chr17 | 29664379 | 29664606 | NF1    |
| chr17 | 29664830 | 29664904 | NF1    |
| chr17 | 29665036 | 29665163 | NF1    |
| chr17 | 29665715 | 29665829 | NF1    |
| chr17 | 29667516 | 29667669 | NF1    |
| chr17 | 29670020 | 29670159 | NF1    |
| chr17 | 29676131 | 29676275 | NF1    |
| chr17 | 29677194 | 29677342 | NF1    |
| chr17 | 29679268 | 29679438 | NF1    |
| chr17 | 29683471 | 29683606 | NF1    |
| chr17 | 29683971 | 29684114 | NF1    |
| chr17 | 29684280 | 29684393 | NF1    |
| chr17 | 29685491 | 29685646 | NF1    |
| chr17 | 29685980 | 29686039 | NF1    |
| chr17 | 29687498 | 29687727 | NF1    |
| chr17 | 29701024 | 29701179 | NF1    |
| chr19 | 29851078 | 29851078 | FP SNP |

|       |          |          |        |
|-------|----------|----------|--------|
| chr6  | 30361193 | 30361193 | FP SNP |
| chr16 | 30712135 | 30712209 | SRCAP  |
| chr16 | 30715374 | 30715646 | SRCAP  |
| chr16 | 30718493 | 30718699 | SRCAP  |
| chr16 | 30718882 | 30719043 | SRCAP  |
| chr16 | 30720823 | 30721066 | SRCAP  |
| chr16 | 30721161 | 30721459 | SRCAP  |
| chr16 | 30722064 | 30722178 | SRCAP  |
| chr16 | 30722309 | 30722419 | SRCAP  |
| chr16 | 30722881 | 30723075 | SRCAP  |
| chr16 | 30723145 | 30723488 | SRCAP  |
| chr16 | 30723572 | 30723770 | SRCAP  |
| chr16 | 30723989 | 30724146 | SRCAP  |
| chr16 | 30724518 | 30724708 | SRCAP  |
| chr16 | 30724829 | 30725042 | SRCAP  |
| chr16 | 30727376 | 30727533 | SRCAP  |
| chr16 | 30727603 | 30727810 | SRCAP  |
| chr22 | 30730576 | 30730690 | SF3A1  |
| chr22 | 30731449 | 30731533 | SF3A1  |
| chr16 | 30731472 | 30731662 | SRCAP  |
| chr22 | 30731634 | 30731748 | SF3A1  |
| chr16 | 30732023 | 30732309 | SRCAP  |
| chr16 | 30732499 | 30732807 | SRCAP  |
| chr22 | 30733008 | 30733175 | SF3A1  |
| chr16 | 30733432 | 30733617 | SRCAP  |
| chr22 | 30733672 | 30733892 | SF3A1  |
| chr16 | 30733873 | 30734079 | SRCAP  |
| chr16 | 30734273 | 30734560 | SRCAP  |
| chr22 | 30734771 | 30735029 | SF3A1  |
| chr16 | 30734894 | 30736413 | SRCAP  |
| chr22 | 30735112 | 30735246 | SF3A1  |
| chr22 | 30736178 | 30736376 | SF3A1  |
| chr22 | 30736677 | 30736807 | SF3A1  |
| chr22 | 30737674 | 30737880 | SF3A1  |
| chr22 | 30738182 | 30738345 | SF3A1  |
| chr22 | 30738787 | 30738874 | SF3A1  |
| chr16 | 30740276 | 30740562 | SRCAP  |
| chr16 | 30740680 | 30740903 | SRCAP  |
| chr22 | 30740915 | 30741185 | SF3A1  |
| chr22 | 30742294 | 30742514 | SF3A1  |
| chr16 | 30744590 | 30744780 | SRCAP  |
| chr16 | 30744912 | 30745129 | SRCAP  |
| chr16 | 30745204 | 30745339 | SRCAP  |

|       |          |          |        |
|-------|----------|----------|--------|
| chr16 | 30745806 | 30745946 | SRCAP  |
| chr16 | 30747510 | 30747725 | SRCAP  |
| chr16 | 30747851 | 30747955 | SRCAP  |
| chr16 | 30748359 | 30751064 | SRCAP  |
| chr22 | 30748933 | 30749067 | SF3A1  |
| chr22 | 30752712 | 30752787 | SF3A1  |
| chr20 | 31021080 | 31025147 | ASXL1  |
| chr6  | 31610529 | 31610529 | FP SNP |
| chr1  | 31770944 | 31770944 | FP SNP |
| chr11 | 32410597 | 32410731 | WT1    |
| chr11 | 32413511 | 32413616 | WT1    |
| chr11 | 32414205 | 32414307 | WT1    |
| chr11 | 32417796 | 32417959 | WT1    |
| chr11 | 32421487 | 32421596 | WT1    |
| chr11 | 32438029 | 32438092 | WT1    |
| chr11 | 32439116 | 32439206 | WT1    |
| chr11 | 32449495 | 32449610 | WT1    |
| chr11 | 32450036 | 32450171 | WT1    |
| chr11 | 32456239 | 32456897 | WT1    |
| chr6  | 33053682 | 33053682 | FP SNP |
| chr11 | 33128256 | 33128256 | FP SNP |
| chr11 | 33162009 | 33162009 | FP SNP |
| chr13 | 33222898 | 33223028 | PDS5B  |
| chr13 | 33225934 | 33226150 | PDS5B  |
| chr13 | 33232369 | 33232468 | PDS5B  |
| chr13 | 33232564 | 33232674 | PDS5B  |
| chr13 | 33233284 | 33233423 | PDS5B  |
| chr6  | 33235755 | 33235755 | FP SNP |
| chr13 | 33241894 | 33241987 | PDS5B  |
| chr13 | 33247346 | 33247499 | PDS5B  |
| chr13 | 33249974 | 33250102 | PDS5B  |
| chr13 | 33252965 | 33253072 | PDS5B  |
| chr13 | 33258008 | 33258166 | PDS5B  |
| chr13 | 33261264 | 33261428 | PDS5B  |
| chr13 | 33262586 | 33262712 | PDS5B  |
| chr13 | 33268353 | 33268447 | PDS5B  |
| chr13 | 33270984 | 33271045 | PDS5B  |
| chr13 | 33273860 | 33274012 | PDS5B  |
| chr13 | 33275453 | 33275581 | PDS5B  |
| chr13 | 33281064 | 33281182 | PDS5B  |
| chr13 | 33284076 | 33284249 | PDS5B  |
| chr13 | 33306231 | 33306367 | PDS5B  |
| chr13 | 33309302 | 33309473 | PDS5B  |



|       |          |          |        |
|-------|----------|----------|--------|
| chr13 | 33315211 | 33315292 | PDS5B  |
| chr13 | 33316722 | 33316871 | PDS5B  |
| chr13 | 33320108 | 33320244 | PDS5B  |
| chr13 | 33327463 | 33327680 | PDS5B  |
| chr13 | 33329973 | 33330100 | PDS5B  |
| chr13 | 33332218 | 33332363 | PDS5B  |
| chr13 | 33332665 | 33332797 | PDS5B  |
| chr13 | 33333759 | 33333834 | PDS5B  |
| chr13 | 33334706 | 33334864 | PDS5B  |
| chr13 | 33338620 | 33338738 | PDS5B  |
| chr13 | 33344252 | 33344704 | PDS5B  |
| chr13 | 33344785 | 33344905 | PDS5B  |
| chr13 | 33347320 | 33347468 | PDS5B  |
| chr13 | 33349148 | 33349196 | PDS5B  |
| chr19 | 33792143 | 33793420 | CEBPA  |
| chr11 | 34906562 | 34906562 | FP SNP |
| chr21 | 36164425 | 36164913 | RUNX1  |
| chr21 | 36171591 | 36171765 | RUNX1  |
| chr21 | 36206700 | 36206904 | RUNX1  |
| chr21 | 36231764 | 36231881 | RUNX1  |
| chr21 | 36252847 | 36253016 | RUNX1  |
| chr21 | 36259133 | 36259415 | RUNX1  |
| chr21 | 36265215 | 36265266 | RUNX1  |
| chr21 | 36421132 | 36421202 | RUNX1  |
| chr22 | 36678707 | 36678837 | MYH9   |
| chr22 | 36680132 | 36680317 | MYH9   |
| chr22 | 36680442 | 36680563 | MYH9   |
| chr22 | 36681160 | 36681381 | MYH9   |
| chr22 | 36681697 | 36681833 | MYH9   |
| chr22 | 36681904 | 36682005 | MYH9   |
| chr22 | 36682757 | 36682898 | MYH9   |
| chr22 | 36684291 | 36684465 | MYH9   |
| chr22 | 36684766 | 36684991 | MYH9   |
| chr22 | 36685124 | 36685349 | MYH9   |
| chr22 | 36688025 | 36688286 | MYH9   |
| chr22 | 36689368 | 36689533 | MYH9   |
| chr22 | 36689798 | 36689915 | MYH9   |
| chr22 | 36690131 | 36690350 | MYH9   |
| chr22 | 36690971 | 36691128 | MYH9   |
| chr22 | 36691544 | 36691769 | MYH9   |
| chr22 | 36692882 | 36693066 | MYH9   |
| chr22 | 36694958 | 36695094 | MYH9   |
| chr22 | 36696166 | 36696316 | MYH9   |

|       |          |          |        |
|-------|----------|----------|--------|
| chr22 | 36696890 | 36697109 | MYH9   |
| chr22 | 36697573 | 36697717 | MYH9   |
| chr22 | 36698607 | 36698728 | MYH9   |
| chr22 | 36700034 | 36700207 | MYH9   |
| chr22 | 36701072 | 36701154 | MYH9   |
| chr22 | 36701969 | 36702103 | MYH9   |
| chr22 | 36702453 | 36702659 | MYH9   |
| chr22 | 36705320 | 36705447 | MYH9   |
| chr22 | 36708087 | 36708273 | MYH9   |
| chr22 | 36710183 | 36710369 | MYH9   |
| chr22 | 36712555 | 36712720 | MYH9   |
| chr22 | 36714245 | 36714376 | MYH9   |
| chr22 | 36715578 | 36715686 | MYH9   |
| chr22 | 36716258 | 36716414 | MYH9   |
| chr22 | 36716836 | 36716947 | MYH9   |
| chr22 | 36717796 | 36717872 | MYH9   |
| chr22 | 36718467 | 36718572 | MYH9   |
| chr22 | 36722606 | 36722712 | MYH9   |
| chr22 | 36723499 | 36723539 | MYH9   |
| chr19 | 36727365 | 36727365 | FP SNP |
| chr22 | 36737408 | 36737577 | MYH9   |
| chr22 | 36744942 | 36745287 | MYH9   |
| chr1  | 36931637 | 36931807 | CSF3R  |
| chr1  | 36931951 | 36932515 | CSF3R  |
| chr1  | 36932824 | 36932918 | CSF3R  |
| chr1  | 36933152 | 36933258 | CSF3R  |
| chr1  | 36933416 | 36933569 | CSF3R  |
| chr7  | 37925438 | 37925438 | FP SNP |
| chr3  | 38181872 | 38182089 | MYD88  |
| chr3  | 38182241 | 38182345 | MYD88  |
| chr3  | 38182616 | 38182782 | MYD88  |
| chr18 | 38236278 | 38236278 | FP SNP |
| chr18 | 38247872 | 38247872 | FP SNP |
| chr22 | 38273749 | 38273749 | FP SNP |
| chr2  | 39082344 | 39082344 | FP SNP |
| chrX  | 39911355 | 39911659 | BCOR   |
| chrX  | 39913132 | 39913301 | BCOR   |
| chrX  | 39913502 | 39913592 | BCOR   |
| chrX  | 39914614 | 39914772 | BCOR   |
| chrX  | 39916401 | 39916580 | BCOR   |
| chrX  | 39921385 | 39921652 | BCOR   |
| chrX  | 39921992 | 39922330 | BCOR   |
| chrX  | 39922854 | 39923211 | BCOR   |

|       |          |          |        |
|-------|----------|----------|--------|
| chrX  | 39923582 | 39923858 | BCOR   |
| chrX  | 39930219 | 39930418 | BCOR   |
| chrX  | 39930883 | 39930949 | BCOR   |
| chrX  | 39931595 | 39934439 | BCOR   |
| chrX  | 39935700 | 39935791 | BCOR   |
| chrX  | 39937090 | 39937188 | BCOR   |
| chr17 | 40359569 | 40359752 | STAT5B |
| chr17 | 40362182 | 40362325 | STAT5B |
| chr17 | 40474293 | 40474518 | STAT3  |
| chr17 | 40475015 | 40475167 | STAT3  |
| chr22 | 41489002 | 41489108 | EP300  |
| chr22 | 41513184 | 41513831 | EP300  |
| chr22 | 41521861 | 41522050 | EP300  |
| chr22 | 41523484 | 41523758 | EP300  |
| chr22 | 41525887 | 41526013 | EP300  |
| chr22 | 41527385 | 41527643 | EP300  |
| chr22 | 41531810 | 41531916 | EP300  |
| chr22 | 41533650 | 41533800 | EP300  |
| chr22 | 41536137 | 41536267 | EP300  |
| chr22 | 41537045 | 41537232 | EP300  |
| chr22 | 41542736 | 41542826 | EP300  |
| chr22 | 41543834 | 41543956 | EP300  |
| chr22 | 41545035 | 41545185 | EP300  |
| chr22 | 41545758 | 41546208 | EP300  |
| chr22 | 41547830 | 41548022 | EP300  |
| chr22 | 41548203 | 41548360 | EP300  |
| chr22 | 41550992 | 41551123 | EP300  |
| chr22 | 41553166 | 41553418 | EP300  |
| chr22 | 41554409 | 41554510 | EP300  |
| chr22 | 41556639 | 41556732 | EP300  |
| chr22 | 41558720 | 41558789 | EP300  |
| chr22 | 41560050 | 41560140 | EP300  |
| chr22 | 41562596 | 41562676 | EP300  |
| chr22 | 41564446 | 41564609 | EP300  |
| chr22 | 41564718 | 41564877 | EP300  |
| chr22 | 41565500 | 41565626 | EP300  |
| chr22 | 41566403 | 41566581 | EP300  |
| chr22 | 41568496 | 41568673 | EP300  |
| chr22 | 41569620 | 41569794 | EP300  |
| chr22 | 41572244 | 41572538 | EP300  |
| chr22 | 41572770 | 41574966 | EP300  |
| chr18 | 42531897 | 42531954 | SETBP1 |
| chr6  | 43299502 | 43299600 | ZNF318 |

|       |          |          |        |
|-------|----------|----------|--------|
| chr6  | 43304885 | 43308250 | ZNF318 |
| chr6  | 43308517 | 43308656 | ZNF318 |
| chr6  | 43309839 | 43309959 | ZNF318 |
| chr6  | 43310403 | 43310627 | ZNF318 |
| chr6  | 43316051 | 43316373 | ZNF318 |
| chr6  | 43320104 | 43320224 | ZNF318 |
| chr6  | 43322391 | 43323893 | ZNF318 |
| chr6  | 43324853 | 43325513 | ZNF318 |
| chr6  | 43333019 | 43333188 | ZNF318 |
| chr6  | 43336694 | 43337113 | ZNF318 |
| chr1  | 43814927 | 43815036 | MPL    |
| chr20 | 44044790 | 44044989 | PIGT   |
| chr20 | 44045150 | 44045340 | PIGT   |
| chr20 | 44047485 | 44047625 | PIGT   |
| chr20 | 44047928 | 44048041 | PIGT   |
| chr20 | 44048137 | 44048236 | PIGT   |
| chr20 | 44048769 | 44048869 | PIGT   |
| chr20 | 44048965 | 44049075 | PIGT   |
| chr20 | 44049161 | 44049339 | PIGT   |
| chr20 | 44050016 | 44050229 | PIGT   |
| chr20 | 44052849 | 44053027 | PIGT   |
| chr20 | 44053129 | 44053225 | PIGT   |
| chr20 | 44054207 | 44054472 | PIGT   |
| chr20 | 44354538 | 44354538 | FP SNP |
| chr21 | 44514758 | 44514904 | U2AF1  |
| chr21 | 44524418 | 44524518 | U2AF1  |
| chr15 | 45003738 | 45003817 | B2M    |
| chr15 | 45007614 | 45007905 | B2M    |
| chr15 | 45008520 | 45008546 | B2M    |
| chr3  | 47058577 | 47058750 | SETD2  |
| chr3  | 47059121 | 47059235 | SETD2  |
| chr3  | 47061243 | 47061336 | SETD2  |
| chr3  | 47079149 | 47079273 | SETD2  |
| chr3  | 47084044 | 47084196 | SETD2  |
| chr3  | 47087970 | 47088117 | SETD2  |
| chr3  | 47098304 | 47098986 | SETD2  |
| chr3  | 47103646 | 47103842 | SETD2  |
| chr3  | 47108553 | 47108614 | SETD2  |
| chr3  | 47125203 | 47125878 | SETD2  |
| chr3  | 47127678 | 47127810 | SETD2  |
| chr3  | 47129596 | 47129743 | SETD2  |
| chr3  | 47139438 | 47139577 | SETD2  |
| chr3  | 47142941 | 47143051 | SETD2  |

|       |          |          |         |
|-------|----------|----------|---------|
| chr3  | 47144829 | 47144919 | SETD2   |
| chr3  | 47147480 | 47147616 | SETD2   |
| chr3  | 47155359 | 47155500 | SETD2   |
| chr3  | 47158106 | 47158250 | SETD2   |
| chr3  | 47161665 | 47166044 | SETD2   |
| chr3  | 47168131 | 47168159 | SETD2   |
| chr3  | 47205337 | 47205420 | SETD2   |
| chr20 | 47850182 | 47850182 | FP SNP  |
| chrX  | 48649510 | 48649742 | GATA1   |
| chrX  | 48650244 | 48650634 | GATA1   |
| chrX  | 48650723 | 48650881 | GATA1   |
| chrX  | 48651572 | 48651710 | GATA1   |
| chrX  | 48652193 | 48652577 | GATA1   |
| chr6  | 48994615 | 48994615 | FP SNP  |
| chr19 | 49518484 | 49518484 | FP SNP  |
| chr5  | 49696932 | 49696932 | FP SNP  |
| chr12 | 50024321 | 50024414 | PRPF40B |
| chr12 | 50025177 | 50025333 | PRPF40B |
| chr12 | 50025636 | 50025714 | PRPF40B |
| chr12 | 50026372 | 50026412 | PRPF40B |
| chr12 | 50026631 | 50026669 | PRPF40B |
| chr12 | 50026790 | 50026913 | PRPF40B |
| chr12 | 50027203 | 50027336 | PRPF40B |
| chr12 | 50027413 | 50027450 | PRPF40B |
| chr12 | 50027662 | 50027881 | PRPF40B |
| chr12 | 50028108 | 50028244 | PRPF40B |
| chr12 | 50028314 | 50028391 | PRPF40B |
| chr12 | 50028875 | 50029052 | PRPF40B |
| chr12 | 50029141 | 50029262 | PRPF40B |
| chr12 | 50029619 | 50029782 | PRPF40B |
| chr12 | 50030492 | 50030638 | PRPF40B |
| chr12 | 50031246 | 50031373 | PRPF40B |
| chr12 | 50031509 | 50031613 | PRPF40B |
| chr12 | 50035684 | 50035813 | PRPF40B |
| chr12 | 50036011 | 50036161 | PRPF40B |
| chr12 | 50036356 | 50036464 | PRPF40B |
| chr12 | 50036703 | 50036805 | PRPF40B |
| chr12 | 50036999 | 50037186 | PRPF40B |
| chr12 | 50037467 | 50037541 | PRPF40B |
| chr12 | 50037637 | 50037793 | PRPF40B |
| chr12 | 50037876 | 50037981 | PRPF40B |
| chr7  | 50358651 | 50358703 | IKZF1   |
| chr7  | 50367227 | 50367359 | IKZF1   |

|       |          |          |        |
|-------|----------|----------|--------|
| chr7  | 50444224 | 50444497 | IKZF1  |
| chr7  | 50450231 | 50450411 | IKZF1  |
| chr7  | 50455036 | 50455174 | IKZF1  |
| chr7  | 50459420 | 50459567 | IKZF1  |
| chr7  | 50467609 | 50468331 | IKZF1  |
| chr7  | 50546261 | 50546261 | FP SNP |
| chr1  | 52266242 | 52266242 | FP SNP |
| chrX  | 53407017 | 53407113 | SMC1A  |
| chrX  | 53407534 | 53407657 | SMC1A  |
| chrX  | 53407932 | 53408014 | SMC1A  |
| chrX  | 53409146 | 53409310 | SMC1A  |
| chrX  | 53409420 | 53409587 | SMC1A  |
| chrX  | 53410011 | 53410180 | SMC1A  |
| chrX  | 53421691 | 53421814 | SMC1A  |
| chrX  | 53423140 | 53423306 | SMC1A  |
| chrX  | 53423385 | 53423543 | SMC1A  |
| chrX  | 53426504 | 53426658 | SMC1A  |
| chrX  | 53430491 | 53430610 | SMC1A  |
| chrX  | 53430702 | 53430831 | SMC1A  |
| chrX  | 53431937 | 53432087 | SMC1A  |
| chrX  | 53432170 | 53432329 | SMC1A  |
| chrX  | 53432418 | 53432610 | SMC1A  |
| chrX  | 53432696 | 53432894 | SMC1A  |
| chrX  | 53435986 | 53436206 | SMC1A  |
| chrX  | 53436345 | 53436440 | SMC1A  |
| chrX  | 53438704 | 53438857 | SMC1A  |
| chrX  | 53438938 | 53439209 | SMC1A  |
| chrX  | 53439843 | 53440094 | SMC1A  |
| chrX  | 53440175 | 53440391 | SMC1A  |
| chrX  | 53441700 | 53441825 | SMC1A  |
| chrX  | 53441923 | 53442124 | SMC1A  |
| chrX  | 53449434 | 53449555 | SMC1A  |
| chr4  | 55589743 | 55589870 | KIT    |
| chr4  | 55593575 | 55593714 | KIT    |
| chr4  | 55599229 | 55599364 | KIT    |
| chr13 | 55937194 | 55937194 | FP SNP |
| chr19 | 56166464 | 56166525 | U2AF2  |
| chr19 | 56170569 | 56170717 | U2AF2  |
| chr19 | 56171536 | 56171593 | U2AF2  |
| chr19 | 56171875 | 56171991 | U2AF2  |
| chr19 | 56172397 | 56172561 | U2AF2  |
| chr19 | 56173861 | 56173990 | U2AF2  |
| chr19 | 56174965 | 56175116 | U2AF2  |

|       |          |          |        |
|-------|----------|----------|--------|
| chr19 | 56179866 | 56179958 | U2AF2  |
| chr19 | 56180029 | 56180164 | U2AF2  |
| chr19 | 56180442 | 56180553 | U2AF2  |
| chr19 | 56180803 | 56181064 | U2AF2  |
| chr19 | 56185293 | 56185440 | U2AF2  |
| chr17 | 56408572 | 56408699 | MIR142 |
| chr20 | 57484398 | 57484484 | GNAS   |
| chr20 | 57484569 | 57484640 | GNAS   |
| chr8  | 58065790 | 58065790 | FP SNP |
| chr2  | 58386893 | 58386941 | FANCL  |
| chr2  | 58387236 | 58387320 | FANCL  |
| chr2  | 58388650 | 58388779 | FANCL  |
| chr2  | 58389994 | 58390088 | FANCL  |
| chr2  | 58390157 | 58390215 | FANCL  |
| chr2  | 58390562 | 58390658 | FANCL  |
| chr2  | 58392852 | 58393015 | FANCL  |
| chr2  | 58425707 | 58425803 | FANCL  |
| chr2  | 58431258 | 58431367 | FANCL  |
| chr2  | 58449070 | 58449183 | FANCL  |
| chr2  | 58453856 | 58453925 | FANCL  |
| chr2  | 58456942 | 58457015 | FANCL  |
| chr2  | 58459182 | 58459253 | FANCL  |
| chr2  | 58468346 | 58468454 | FANCL  |
| chr17 | 58740349 | 58740919 | PPM1D  |
| chr10 | 60012231 | 60012231 | FP SNP |
| chr17 | 61908556 | 61908556 | FP SNP |
| chr11 | 64532854 | 64532996 | SF1    |
| chr11 | 64533283 | 64533633 | SF1    |
| chr11 | 64533416 | 64533633 | SF1    |
| chr11 | 64534365 | 64534557 | SF1    |
| chr11 | 64534657 | 64534729 | SF1    |
| chr11 | 64535036 | 64535322 | SF1    |
| chr11 | 64535571 | 64535764 | SF1    |
| chr11 | 64536487 | 64536607 | SF1    |
| chr11 | 64536688 | 64536816 | SF1    |
| chr11 | 64536891 | 64537087 | SF1    |
| chr11 | 64537429 | 64537531 | SF1    |
| chr11 | 64537721 | 64537886 | SF1    |
| chr11 | 64540895 | 64540983 | SF1    |
| chr11 | 64543963 | 64544104 | SF1    |
| chr11 | 64545452 | 64545870 | SF1    |
| chr11 | 64545827 | 64545870 | SF1    |
| chr5  | 64881936 | 64881936 | FP SNP |

|       |          |          |        |
|-------|----------|----------|--------|
| chrX  | 65606556 | 65606556 | FP SNP |
| chr14 | 67086676 | 67086676 | FP SNP |
| chr14 | 67128804 | 67128804 | FP SNP |
| chr16 | 67644729 | 67645522 | CTCF   |
| chr16 | 67645847 | 67646030 | CTCF   |
| chr16 | 67650641 | 67650787 | CTCF   |
| chr16 | 67654593 | 67654726 | CTCF   |
| chr16 | 67655338 | 67655500 | CTCF   |
| chr16 | 67660451 | 67660624 | CTCF   |
| chr16 | 67662266 | 67662461 | CTCF   |
| chr16 | 67663294 | 67663442 | CTCF   |
| chr16 | 67670586 | 67670760 | CTCF   |
| chr16 | 67671584 | 67671781 | CTCF   |
| chr7  | 68182022 | 68182022 | FP SNP |
| chr2  | 71633389 | 71633389 | FP SNP |
| chr5  | 74069863 | 74069863 | FP SNP |
| chr14 | 74428445 | 74428445 | FP SNP |
| chr1  | 74673341 | 74673341 | FP SNP |
| chr17 | 74732236 | 74733248 | SRSF2  |
| chr14 | 75230182 | 75231075 | YLPM1  |
| chr14 | 75245139 | 75245396 | YLPM1  |
| chr14 | 75247097 | 75247301 | YLPM1  |
| chr14 | 75248026 | 75249038 | YLPM1  |
| chr14 | 75264272 | 75266410 | YLPM1  |
| chr14 | 75269248 | 75269389 | YLPM1  |
| chr14 | 75276072 | 75276510 | YLPM1  |
| chr14 | 75276602 | 75276715 | YLPM1  |
| chr14 | 75276917 | 75277133 | YLPM1  |
| chr14 | 75278312 | 75278451 | YLPM1  |
| chr14 | 75279320 | 75279495 | YLPM1  |
| chr14 | 75282895 | 75282978 | YLPM1  |
| chr14 | 75283263 | 75283403 | YLPM1  |
| chr14 | 75283623 | 75283820 | YLPM1  |
| chr14 | 75283886 | 75283990 | YLPM1  |
| chr14 | 75284923 | 75285027 | YLPM1  |
| chr14 | 75287749 | 75287913 | YLPM1  |
| chr14 | 75290948 | 75291020 | YLPM1  |
| chr14 | 75295905 | 75296056 | YLPM1  |
| chr14 | 75301957 | 75302124 | YLPM1  |
| chr14 | 75321909 | 75322055 | YLPM1  |
| chrX  | 76763822 | 76764113 | ATRX   |
| chrX  | 76776259 | 76776400 | ATRX   |
| chrX  | 76776874 | 76776982 | ATRX   |



|       |          |          |        |
|-------|----------|----------|--------|
| chrX  | 76777734 | 76777872 | ATRX   |
| chrX  | 76778723 | 76778885 | ATRX   |
| chrX  | 76812915 | 76813122 | ATRX   |
| chrX  | 76814133 | 76814323 | ATRX   |
| chrX  | 76829708 | 76829829 | ATRX   |
| chrX  | 76845297 | 76845416 | ATRX   |
| chrX  | 76849159 | 76849325 | ATRX   |
| chrX  | 76854873 | 76855055 | ATRX   |
| chrX  | 76855194 | 76855295 | ATRX   |
| chrX  | 76855896 | 76856039 | ATRX   |
| chrX  | 76872074 | 76872204 | ATRX   |
| chrX  | 76874267 | 76874455 | ATRX   |
| chrX  | 76875856 | 76876006 | ATRX   |
| chrX  | 76888688 | 76888878 | ATRX   |
| chrX  | 76889047 | 76889206 | ATRX   |
| chrX  | 76890078 | 76890200 | ATRX   |
| chrX  | 76891399 | 76891553 | ATRX   |
| chrX  | 76907597 | 76907849 | ATRX   |
| chrX  | 76909581 | 76909696 | ATRX   |
| chrX  | 76912043 | 76912149 | ATRX   |
| chrX  | 76918864 | 76919053 | ATRX   |
| chrX  | 76920127 | 76920273 | ATRX   |
| chrX  | 76931714 | 76931799 | ATRX   |
| chrX  | 76937005 | 76940091 | ATRX   |
| chrX  | 76940424 | 76940504 | ATRX   |
| chrX  | 76944304 | 76944426 | ATRX   |
| chrX  | 76949306 | 76949432 | ATRX   |
| chrX  | 76952058 | 76952198 | ATRX   |
| chrX  | 76953064 | 76953129 | ATRX   |
| chrX  | 76954055 | 76954123 | ATRX   |
| chrX  | 76972601 | 76972726 | ATRX   |
| chrX  | 77041461 | 77041493 | ATRX   |
| chr9  | 77175017 | 77175017 | FP SNP |
| chr17 | 77790135 | 77790135 | FP SNP |
| chr18 | 77894844 | 77894844 | FP SNP |
| chr17 | 79574124 | 79574124 | FP SNP |
| chr6  | 79650399 | 79651057 | PHIP   |
| chr6  | 79655006 | 79655224 | PHIP   |
| chr6  | 79655477 | 79655477 | FP SNP |
| chr6  | 79655707 | 79655987 | PHIP   |
| chr6  | 79656417 | 79656601 | PHIP   |
| chr6  | 79657329 | 79657502 | PHIP   |
| chr6  | 79664520 | 79664690 | PHIP   |

|       |          |          |        |
|-------|----------|----------|--------|
| chr6  | 79664938 | 79665009 | PHIP   |
| chr6  | 79665319 | 79665409 | PHIP   |
| chr6  | 79668181 | 79668327 | PHIP   |
| chr6  | 79671396 | 79671537 | PHIP   |
| chr6  | 79672803 | 79672979 | PHIP   |
| chr6  | 79675409 | 79675491 | PHIP   |
| chr6  | 79675651 | 79675783 | PHIP   |
| chr6  | 79679541 | 79679644 | PHIP   |
| chr6  | 79679755 | 79679900 | PHIP   |
| chr6  | 79680487 | 79680615 | PHIP   |
| chr6  | 79688298 | 79688438 | PHIP   |
| chr6  | 79692592 | 79692844 | PHIP   |
| chr6  | 79695058 | 79695155 | PHIP   |
| chr6  | 79697915 | 79698076 | PHIP   |
| chr6  | 79700574 | 79700712 | PHIP   |
| chr6  | 79707120 | 79707324 | PHIP   |
| chr6  | 79707960 | 79708118 | PHIP   |
| chr6  | 79711605 | 79711851 | PHIP   |
| chr6  | 79713436 | 79713585 | PHIP   |
| chr6  | 79724788 | 79724943 | PHIP   |
| chr6  | 79725336 | 79725510 | PHIP   |
| chr6  | 79726250 | 79726369 | PHIP   |
| chr6  | 79727052 | 79727113 | PHIP   |
| chr6  | 79727189 | 79727310 | PHIP   |
| chr6  | 79728795 | 79728886 | PHIP   |
| chr6  | 79735225 | 79735346 | PHIP   |
| chr6  | 79735649 | 79735891 | PHIP   |
| chr6  | 79752549 | 79752730 | PHIP   |
| chr6  | 79770184 | 79770303 | PHIP   |
| chr6  | 79770374 | 79770545 | PHIP   |
| chr6  | 79787154 | 79787234 | PHIP   |
| chr6  | 79787406 | 79787456 | PHIP   |
| chr6  | 79787561 | 79787640 | PHIP   |
| chr6  | 79787735 | 79787795 | PHIP   |
| chr13 | 79948683 | 79948683 | FP SNP |
| chr1  | 83147308 | 83147308 | FP SNP |
| chr2  | 86337930 | 86337930 | FP SNP |
| chr7  | 86625642 | 86625642 | FP SNP |
| chr10 | 89624226 | 89624305 | PTEN   |
| chr10 | 89653781 | 89653866 | PTEN   |
| chr10 | 89685269 | 89685314 | PTEN   |
| chr10 | 89690802 | 89690846 | PTEN   |
| chr10 | 89692769 | 89693008 | PTEN   |

|       |           |           |        |
|-------|-----------|-----------|--------|
| chr10 | 89711874  | 89712016  | PTEN   |
| chr10 | 89717609  | 89717776  | PTEN   |
| chr10 | 89720650  | 89720875  | PTEN   |
| chr10 | 89725043  | 89725229  | PTEN   |
| chrX  | 90596159  | 90596159  | FP SNP |
| chr15 | 90631762  | 90631985  | IDH2   |
| chr11 | 94153284  | 94153353  | MRE11A |
| chr11 | 94163070  | 94163158  | MRE11A |
| chr11 | 94168991  | 94169071  | MRE11A |
| chr11 | 94170336  | 94170407  | MRE11A |
| chr11 | 94178969  | 94179065  | MRE11A |
| chr11 | 94180378  | 94180610  | MRE11A |
| chr11 | 94189435  | 94189510  | MRE11A |
| chr11 | 94192567  | 94192753  | MRE11A |
| chr11 | 94194095  | 94194208  | MRE11A |
| chr11 | 94197272  | 94197411  | MRE11A |
| chr11 | 94200972  | 94201065  | MRE11A |
| chr11 | 94203630  | 94203814  | MRE11A |
| chr11 | 94204733  | 94204931  | MRE11A |
| chr11 | 94209448  | 94209575  | MRE11A |
| chr11 | 94211894  | 94212048  | MRE11A |
| chr11 | 94212833  | 94212933  | MRE11A |
| chr11 | 94219083  | 94219256  | MRE11A |
| chr11 | 94223992  | 94224137  | MRE11A |
| chr11 | 94225941  | 94225973  | MRE11A |
| chr3  | 95176677  | 95176677  | FP SNP |
| chr5  | 96245518  | 96245518  | FP SNP |
| chr4  | 99037859  | 99037859  | FP SNP |
| chr5  | 99156362  | 99156362  | FP SNP |
| chr11 | 99512311  | 99512311  | FP SNP |
| chr3  | 101058775 | 101058775 | FP SNP |
| chr7  | 101459304 | 101459379 | CUX1   |
| chr7  | 101559388 | 101559511 | CUX1   |
| chr7  | 101671371 | 101671431 | CUX1   |
| chr5  | 101671415 | 101671415 | FP SNP |
| chr7  | 101713612 | 101713703 | CUX1   |
| chr7  | 101740637 | 101740787 | CUX1   |
| chr7  | 101747609 | 101747745 | CUX1   |
| chr7  | 101754971 | 101755060 | CUX1   |
| chr7  | 101758480 | 101758559 | CUX1   |
| chr7  | 101801833 | 101801894 | CUX1   |
| chr7  | 101813719 | 101813836 | CUX1   |
| chr7  | 101821742 | 101821943 | CUX1   |

|       |           |           |      |
|-------|-----------|-----------|------|
| chr7  | 101833086 | 101833157 | CUX1 |
| chr7  | 101837115 | 101837176 | CUX1 |
| chr7  | 101838780 | 101838889 | CUX1 |
| chr7  | 101839907 | 101840591 | CUX1 |
| chr7  | 101842075 | 101842153 | CUX1 |
| chr7  | 101843344 | 101843458 | CUX1 |
| chr7  | 101844633 | 101845490 | CUX1 |
| chr7  | 101847664 | 101847842 | CUX1 |
| chr7  | 101848387 | 101848456 | CUX1 |
| chr7  | 101870640 | 101870955 | CUX1 |
| chr7  | 101877325 | 101877526 | CUX1 |
| chr7  | 101882593 | 101882870 | CUX1 |
| chr7  | 101891685 | 101892328 | CUX1 |
| chr7  | 101916630 | 101916770 | CUX1 |
| chr7  | 101917508 | 101917587 | CUX1 |
| chr7  | 101918511 | 101918636 | CUX1 |
| chr7  | 101921213 | 101921342 | CUX1 |
| chr7  | 101923322 | 101923418 | CUX1 |
| chr7  | 101924089 | 101924158 | CUX1 |
| chr7  | 101925125 | 101925218 | CUX1 |
| chr7  | 101925997 | 101926074 | CUX1 |
| chr7  | 101926306 | 101926388 | CUX1 |
| chr3  | 105438884 | 105439100 | CBLB |
| chr3  | 105452846 | 105452990 | CBLB |
| chr4  | 106155093 | 106158603 | TET2 |
| chr4  | 106162489 | 106162592 | TET2 |
| chr4  | 106163984 | 106164090 | TET2 |
| chr4  | 106164720 | 106164941 | TET2 |
| chr4  | 106180769 | 106180932 | TET2 |
| chr4  | 106182909 | 106183011 | TET2 |
| chr4  | 106190760 | 106190910 | TET2 |
| chr4  | 106193714 | 106194081 | TET2 |
| chr4  | 106196198 | 106197682 | TET2 |
| chr11 | 108098321 | 108098423 | ATM  |
| chr11 | 108098502 | 108098615 | ATM  |
| chr11 | 108099904 | 108100050 | ATM  |
| chr11 | 108106396 | 108106561 | ATM  |
| chr11 | 108114679 | 108114845 | ATM  |
| chr11 | 108115514 | 108115753 | ATM  |
| chr11 | 108117690 | 108117854 | ATM  |
| chr11 | 108119659 | 108119829 | ATM  |
| chr11 | 108121427 | 108121799 | ATM  |
| chr11 | 108122563 | 108122758 | ATM  |

|       |           |           |     |
|-------|-----------|-----------|-----|
| chr11 | 108123543 | 108123639 | ATM |
| chr11 | 108124540 | 108124766 | ATM |
| chr11 | 108126941 | 108127067 | ATM |
| chr11 | 108128207 | 108128333 | ATM |
| chr11 | 108129712 | 108129802 | ATM |
| chr11 | 108137897 | 108138069 | ATM |
| chr11 | 108139136 | 108139336 | ATM |
| chr11 | 108141790 | 108141873 | ATM |
| chr11 | 108141977 | 108142133 | ATM |
| chr11 | 108143258 | 108143334 | ATM |
| chr11 | 108143448 | 108143579 | ATM |
| chr11 | 108150217 | 108150335 | ATM |
| chr11 | 108151721 | 108151895 | ATM |
| chr11 | 108153436 | 108153606 | ATM |
| chr11 | 108154953 | 108155200 | ATM |
| chr11 | 108158326 | 108158442 | ATM |
| chr11 | 108159703 | 108159830 | ATM |
| chr11 | 108160328 | 108160528 | ATM |
| chr11 | 108163345 | 108163520 | ATM |
| chr11 | 108164039 | 108164204 | ATM |
| chr11 | 108165653 | 108165786 | ATM |
| chr11 | 108168013 | 108168109 | ATM |
| chr11 | 108170440 | 108170612 | ATM |
| chr11 | 108172374 | 108172516 | ATM |
| chr11 | 108173579 | 108173756 | ATM |
| chr11 | 108175401 | 108175579 | ATM |
| chr11 | 108178623 | 108178711 | ATM |
| chr11 | 108180886 | 108181042 | ATM |
| chr11 | 108183137 | 108183225 | ATM |
| chr11 | 108186549 | 108186638 | ATM |
| chr11 | 108186737 | 108186840 | ATM |
| chr11 | 108188099 | 108188248 | ATM |
| chr11 | 108190680 | 108190785 | ATM |
| chr11 | 108192027 | 108192147 | ATM |
| chr11 | 108196036 | 108196271 | ATM |
| chr11 | 108196784 | 108196952 | ATM |
| chr11 | 108198371 | 108198485 | ATM |
| chr11 | 108199747 | 108199965 | ATM |
| chr11 | 108200940 | 108201148 | ATM |
| chr11 | 108202170 | 108202284 | ATM |
| chr11 | 108202605 | 108202764 | ATM |
| chr11 | 108203488 | 108203627 | ATM |
| chr11 | 108204612 | 108204695 | ATM |

|       |           |           |        |
|-------|-----------|-----------|--------|
| chr11 | 108205695 | 108205836 | ATM    |
| chr11 | 108206571 | 108206688 | ATM    |
| chr11 | 108213948 | 108214098 | ATM    |
| chr11 | 108216469 | 108216635 | ATM    |
| chr11 | 108218005 | 108218092 | ATM    |
| chr11 | 108224492 | 108224607 | ATM    |
| chr11 | 108225537 | 108225601 | ATM    |
| chr11 | 108235808 | 108235945 | ATM    |
| chr11 | 108236051 | 108236235 | ATM    |
| chr6  | 109954252 | 109954252 | FP SNP |
| chr6  | 111283592 | 111283592 | FP SNP |
| chr12 | 111855943 | 111856687 | SH2B3  |
| chr12 | 111884550 | 111884664 | SH2B3  |
| chr12 | 111884739 | 111884843 | SH2B3  |
| chr12 | 111884922 | 111885029 | SH2B3  |
| chr12 | 111885127 | 111885354 | SH2B3  |
| chr12 | 111885453 | 111885637 | SH2B3  |
| chr12 | 111885780 | 111886112 | SH2B3  |
| chr3  | 111981924 | 111981924 | FP SNP |
| chr10 | 112327568 | 112327595 | SMC3   |
| chr10 | 112328689 | 112328777 | SMC3   |
| chr10 | 112333458 | 112333509 | SMC3   |
| chr10 | 112335087 | 112335167 | SMC3   |
| chr10 | 112337172 | 112337256 | SMC3   |
| chr10 | 112337586 | 112337678 | SMC3   |
| chr10 | 112338379 | 112338470 | SMC3   |
| chr10 | 112340655 | 112340785 | SMC3   |
| chr10 | 112341674 | 112341862 | SMC3   |
| chr10 | 112342313 | 112342406 | SMC3   |
| chr10 | 112343135 | 112343312 | SMC3   |
| chr10 | 112343592 | 112343726 | SMC3   |
| chr10 | 112343934 | 112344160 | SMC3   |
| chr10 | 112349356 | 112349472 | SMC3   |
| chr10 | 112349643 | 112349755 | SMC3   |
| chr10 | 112350163 | 112350336 | SMC3   |
| chr10 | 112350742 | 112350896 | SMC3   |
| chr10 | 112352824 | 112352987 | SMC3   |
| chr10 | 112356149 | 112356314 | SMC3   |
| chr10 | 112357890 | 112358054 | SMC3   |
| chr10 | 112359405 | 112359576 | SMC3   |
| chr10 | 112360190 | 112360310 | SMC3   |
| chr10 | 112360773 | 112360894 | SMC3   |
| chr10 | 112361388 | 112361648 | SMC3   |

|       |           |           |        |
|-------|-----------|-----------|--------|
| chr10 | 112361717 | 112361942 | SMC3   |
| chr10 | 112362225 | 112362429 | SMC3   |
| chr10 | 112362576 | 112362766 | SMC3   |
| chr10 | 112362935 | 112363054 | SMC3   |
| chr10 | 112363982 | 112364066 | SMC3   |
| chr2  | 112748514 | 112748514 | FP SNP |
| chr2  | 112753097 | 112753097 | FP SNP |
| chr12 | 112856909 | 112856935 | PTPN11 |
| chr12 | 112884073 | 112884208 | PTPN11 |
| chr12 | 112888115 | 112888322 | PTPN11 |
| chr12 | 112890992 | 112891197 | PTPN11 |
| chr12 | 112892361 | 112892490 | PTPN11 |
| chr12 | 112893747 | 112893873 | PTPN11 |
| chr12 | 112910741 | 112910850 | PTPN11 |
| chr12 | 112915448 | 112915540 | PTPN11 |
| chr12 | 112915654 | 112915825 | PTPN11 |
| chr12 | 112919871 | 112920015 | PTPN11 |
| chr12 | 112924272 | 112924439 | PTPN11 |
| chr12 | 112926240 | 112926320 | PTPN11 |
| chr12 | 112926821 | 112926985 | PTPN11 |
| chr12 | 112939941 | 112940066 | PTPN11 |
| chr12 | 112942492 | 112942574 | PTPN11 |
| chr4  | 114863593 | 114863593 | FP SNP |
| chr1  | 115251140 | 115251282 | NRAS   |
| chr1  | 115252178 | 115252360 | NRAS   |
| chr1  | 115256409 | 115256610 | NRAS   |
| chr1  | 115258659 | 115258792 | NRAS   |
| chr7  | 115895718 | 115895718 | FP SNP |
| chr9  | 115950706 | 115950706 | FP SNP |
| chrX  | 116603406 | 116603406 | FP SNP |
| chr8  | 117859732 | 117859936 | RAD21  |
| chr8  | 117861178 | 117861274 | RAD21  |
| chr8  | 117862850 | 117863012 | RAD21  |
| chr8  | 117864180 | 117864341 | RAD21  |
| chr8  | 117864781 | 117864953 | RAD21  |
| chr8  | 117866477 | 117866713 | RAD21  |
| chr8  | 117868398 | 117868533 | RAD21  |
| chr8  | 117868878 | 117869016 | RAD21  |
| chr8  | 117869499 | 117869718 | RAD21  |
| chr8  | 117870584 | 117870703 | RAD21  |
| chr8  | 117874073 | 117874185 | RAD21  |
| chr8  | 117875362 | 117875504 | RAD21  |
| chr8  | 117878818 | 117878974 | RAD21  |

|       |           |           |        |
|-------|-----------|-----------|--------|
| chr2  | 118281844 | 118281844 | FP SNP |
| chr11 | 119148460 | 119148560 | CBL    |
| chr11 | 119148869 | 119149013 | CBL    |
| chr11 | 119149213 | 119149429 | CBL    |
| chrX  | 119387260 | 119389299 | ZBTB33 |
| chr1  | 120457922 | 120459323 | NOTCH2 |
| chr1  | 120460281 | 120460391 | NOTCH2 |
| chr1  | 120461928 | 120462242 | NOTCH2 |
| chr1  | 120462845 | 120463026 | NOTCH2 |
| chr1  | 120464329 | 120464438 | NOTCH2 |
| chr1  | 120464852 | 120465075 | NOTCH2 |
| chr1  | 120465252 | 120465407 | NOTCH2 |
| chr1  | 120466253 | 120466613 | NOTCH2 |
| chr1  | 120467921 | 120468439 | NOTCH2 |
| chr3  | 121633904 | 121633904 | FP SNP |
| chrX  | 123156471 | 123156527 | STAG2  |
| chrX  | 123159683 | 123159774 | STAG2  |
| chrX  | 123164804 | 123164981 | STAG2  |
| chrX  | 123171370 | 123171479 | STAG2  |
| chrX  | 123176412 | 123176501 | STAG2  |
| chrX  | 123179007 | 123179224 | STAG2  |
| chrX  | 123181197 | 123181361 | STAG2  |
| chrX  | 123182848 | 123182934 | STAG2  |
| chrX  | 123184029 | 123184165 | STAG2  |
| chrX  | 123184964 | 123185075 | STAG2  |
| chrX  | 123185158 | 123185250 | STAG2  |
| chrX  | 123189971 | 123190091 | STAG2  |
| chrX  | 123191709 | 123191833 | STAG2  |
| chrX  | 123195067 | 123195197 | STAG2  |
| chrX  | 123195614 | 123195730 | STAG2  |
| chrX  | 123196745 | 123196850 | STAG2  |
| chrX  | 123196959 | 123197061 | STAG2  |
| chrX  | 123197691 | 123197907 | STAG2  |
| chrX  | 123199719 | 123199802 | STAG2  |
| chrX  | 123200018 | 123200118 | STAG2  |
| chrX  | 123200199 | 123200292 | STAG2  |
| chrX  | 123202407 | 123202512 | STAG2  |
| chrX  | 123204992 | 123205179 | STAG2  |
| chrX  | 123210175 | 123210327 | STAG2  |
| chrX  | 123211800 | 123211914 | STAG2  |
| chrX  | 123215223 | 123215384 | STAG2  |
| chrX  | 123217264 | 123217405 | STAG2  |
| chrX  | 123220390 | 123220626 | STAG2  |



|       |           |           |        |
|-------|-----------|-----------|--------|
| chrX  | 123224418 | 123224620 | STAG2  |
| chrX  | 123224697 | 123224820 | STAG2  |
| chrX  | 123227861 | 123228000 | STAG2  |
| chrX  | 123229215 | 123229305 | STAG2  |
| chrX  | 123234417 | 123234453 | STAG2  |
| chr11 | 124115370 | 124115370 | FP SNP |
| chr8  | 124453662 | 124453662 | FP SNP |
| chr8  | 124461074 | 124461074 | FP SNP |
| chr9  | 127910307 | 127910307 | FP SNP |
| chr3  | 128198259 | 128200171 | GATA2  |
| chr3  | 128200651 | 128202858 | GATA2  |
| chr3  | 128204559 | 128205929 | GATA2  |
| chr3  | 128206543 | 128207383 | GATA2  |
| chr8  | 128748829 | 128748879 | MYC    |
| chr8  | 128750483 | 128751275 | MYC    |
| chr8  | 128752631 | 128753214 | MYC    |
| chrX  | 129139201 | 129139299 | BCORL1 |
| chrX  | 129146547 | 129146650 | BCORL1 |
| chrX  | 129146919 | 129150195 | BCORL1 |
| chrX  | 129154953 | 129155131 | BCORL1 |
| chrX  | 129156865 | 129156958 | BCORL1 |
| chrX  | 129158958 | 129159360 | BCORL1 |
| chrX  | 129162603 | 129162842 | BCORL1 |
| chrX  | 129171335 | 129171514 | BCORL1 |
| chrX  | 129173105 | 129173263 | BCORL1 |
| chrX  | 129184685 | 129184775 | BCORL1 |
| chrX  | 129185828 | 129185997 | BCORL1 |
| chrX  | 129189822 | 129190117 | BCORL1 |
| chrX  | 133511641 | 133511791 | PHF6   |
| chrX  | 133512028 | 133512142 | PHF6   |
| chrX  | 133527524 | 133527670 | PHF6   |
| chrX  | 133527932 | 133527988 | PHF6   |
| chrX  | 133547514 | 133547693 | PHF6   |
| chrX  | 133547846 | 133548002 | PHF6   |
| chrX  | 133549039 | 133549259 | PHF6   |
| chrX  | 133551192 | 133551338 | PHF6   |
| chrX  | 133559224 | 133559366 | PHF6   |
| chr3  | 136057089 | 136057125 | STAG1  |
| chr3  | 136057205 | 136057298 | STAG1  |
| chr3  | 136059326 | 136059453 | STAG1  |
| chr3  | 136060276 | 136060399 | STAG1  |
| chr3  | 136062667 | 136062854 | STAG1  |
| chr3  | 136067993 | 136068211 | STAG1  |

|      |           |           |        |
|------|-----------|-----------|--------|
| chr3 | 136076555 | 136076696 | STAG1  |
| chr3 | 136077983 | 136078144 | STAG1  |
| chr3 | 136082201 | 136082315 | STAG1  |
| chr3 | 136085778 | 136085930 | STAG1  |
| chr3 | 136087943 | 136088130 | STAG1  |
| chr3 | 136096495 | 136096600 | STAG1  |
| chr3 | 136117584 | 136117677 | STAG1  |
| chr3 | 136136720 | 136136820 | STAG1  |
| chr3 | 136139928 | 136140011 | STAG1  |
| chr3 | 136141245 | 136141461 | STAG1  |
| chr3 | 136141603 | 136141705 | STAG1  |
| chr3 | 136141787 | 136141892 | STAG1  |
| chr3 | 136152391 | 136152507 | STAG1  |
| chr3 | 136162122 | 136162252 | STAG1  |
| chr3 | 136170868 | 136170995 | STAG1  |
| chr3 | 136183716 | 136183836 | STAG1  |
| chr3 | 136191248 | 136191340 | STAG1  |
| chr3 | 136192374 | 136192485 | STAG1  |
| chr3 | 136196124 | 136196260 | STAG1  |
| chr3 | 136219058 | 136219144 | STAG1  |
| chr3 | 136221463 | 136221627 | STAG1  |
| chr3 | 136240048 | 136240265 | STAG1  |
| chr3 | 136260954 | 136261043 | STAG1  |
| chr3 | 136287600 | 136287709 | STAG1  |
| chr3 | 136323144 | 136323321 | STAG1  |
| chr3 | 136341981 | 136342096 | STAG1  |
| chr3 | 136349705 | 136349746 | STAG1  |
| chr8 | 137818388 | 137818388 | FP SNP |
| chr7 | 139045001 | 139045074 | LUC7L2 |
| chr7 | 139060801 | 139060908 | LUC7L2 |
| chr7 | 139083338 | 139083449 | LUC7L2 |
| chr7 | 139086876 | 139086999 | LUC7L2 |
| chr7 | 139090383 | 139090539 | LUC7L2 |
| chr7 | 139091913 | 139092102 | LUC7L2 |
| chr7 | 139094302 | 139094406 | LUC7L2 |
| chr7 | 139097290 | 139097332 | LUC7L2 |
| chr7 | 139102277 | 139102481 | LUC7L2 |
| chr7 | 139106902 | 139107092 | LUC7L2 |
| chr9 | 139390516 | 139392016 | NOTCH1 |
| chr9 | 139393344 | 139393454 | NOTCH1 |
| chr9 | 139393557 | 139393717 | NOTCH1 |
| chr9 | 139394997 | 139395305 | NOTCH1 |
| chr9 | 139396193 | 139396371 | NOTCH1 |

|      |           |           |          |
|------|-----------|-----------|----------|
| chr9 | 139396446 | 139396546 | NOTCH1   |
| chr9 | 139396717 | 139396946 | NOTCH1   |
| chr9 | 139397627 | 139397788 | NOTCH1   |
| chr9 | 139399118 | 139399562 | NOTCH1   |
| chr9 | 139399755 | 139400339 | NOTCH1   |
| chr9 | 139400972 | 139401097 | NOTCH1   |
| chr7 | 140453068 | 140453199 | BRAF     |
| chr5 | 140590766 | 140590766 | FP SNP   |
| chr7 | 148504731 | 148504804 | EZH2     |
| chr7 | 148506156 | 148506253 | EZH2     |
| chr7 | 148506395 | 148506488 | EZH2     |
| chr7 | 148507418 | 148507512 | EZH2     |
| chr7 | 148508710 | 148508818 | EZH2     |
| chr7 | 148511044 | 148511235 | EZH2     |
| chr7 | 148511999 | 148512137 | EZH2     |
| chr7 | 148512591 | 148512644 | EZH2     |
| chr7 | 148513769 | 148513876 | EZH2     |
| chr7 | 148514307 | 148514489 | EZH2     |
| chr7 | 148514962 | 148515215 | EZH2     |
| chr7 | 148516681 | 148516785 | EZH2     |
| chr7 | 148523539 | 148523730 | EZH2     |
| chr7 | 148524249 | 148524364 | EZH2     |
| chr7 | 148525825 | 148525978 | EZH2     |
| chr7 | 148526813 | 148526946 | EZH2     |
| chr7 | 148529719 | 148529848 | EZH2     |
| chr7 | 148543555 | 148543696 | EZH2     |
| chr7 | 148544267 | 148544396 | EZH2     |
| chr5 | 148876409 | 148876429 | CSNK1A3  |
| chr5 | 148885003 | 148885164 | CSNK1A2  |
| chr5 | 148886583 | 148886702 | CSNK1A11 |
| chr5 | 148889435 | 148889522 | CSNK1A10 |
| chr5 | 148891350 | 148891441 | CSNK1A9  |
| chr5 | 148892626 | 148892778 | CSNK1A8  |
| chr5 | 148897350 | 148897446 | CSNK1A7  |
| chr5 | 148899846 | 148899957 | CSNK1A6  |
| chr5 | 148904601 | 148904740 | CSNK1A5  |
| chr5 | 148929631 | 148929750 | CSNK1A4  |
| chr5 | 148930398 | 148930533 | CSNK1A1  |
| chr5 | 149433625 | 149433793 | CSF1R    |
| chr1 | 150039908 | 150040013 | VPS45    |
| chr1 | 150040680 | 150040827 | VPS45    |
| chr1 | 150044226 | 150044299 | VPS45    |
| chr1 | 150048304 | 150048396 | VPS45    |

|      |           |           |        |
|------|-----------|-----------|--------|
| chr1 | 150048987 | 150049068 | VPS45  |
| chr1 | 150049165 | 150049315 | VPS45  |
| chr1 | 150049740 | 150049863 | VPS45  |
| chr1 | 150053417 | 150053564 | VPS45  |
| chr1 | 150053959 | 150054085 | VPS45  |
| chr1 | 150054793 | 150054973 | VPS45  |
| chr1 | 150064024 | 150064195 | VPS45  |
| chr1 | 150064389 | 150064509 | VPS45  |
| chr1 | 150065616 | 150065750 | VPS45  |
| chr1 | 150082604 | 150082748 | VPS45  |
| chr1 | 150116880 | 150116980 | VPS45  |
| chr1 | 150658971 | 150658971 | FP SNP |
| chr4 | 152355268 | 152355268 | FP SNP |
| chr5 | 153363334 | 153363334 | FP SNP |
| chrX | 154299796 | 154299931 | BRCC3  |
| chrX | 154300595 | 154300624 | BRCC3  |
| chrX | 154301642 | 154301712 | BRCC3  |
| chrX | 154305438 | 154305570 | BRCC3  |
| chrX | 154306884 | 154306984 | BRCC3  |
| chrX | 154317531 | 154317632 | BRCC3  |
| chrX | 154319052 | 154319120 | BRCC3  |
| chrX | 154327583 | 154327670 | BRCC3  |
| chrX | 154344325 | 154344469 | BRCC3  |
| chrX | 154344979 | 154345035 | BRCC3  |
| chrX | 154348267 | 154348431 | BRCC3  |
| chr1 | 154573967 | 154573967 | FP SNP |
| chr1 | 155870172 | 155870415 | RIT1   |
| chr1 | 155874095 | 155874299 | RIT1   |
| chr1 | 155874515 | 155874601 | RIT1   |
| chr1 | 155880234 | 155880303 | RIT1   |
| chr1 | 155880440 | 155880601 | RIT1   |
| chr1 | 155880662 | 155880682 | RIT1   |
| chr1 | 156202173 | 156202173 | FP SNP |
| chr5 | 156766708 | 156766708 | FP SNP |
| chr6 | 160211339 | 160211339 | FP SNP |
| chr3 | 169482391 | 169482854 | TERT   |
| chr3 | 169482391 | 169482854 | TERC   |
| chr5 | 170834697 | 170834784 | NPM1   |
| chr5 | 170837524 | 170837575 | NPM1   |
| chr5 | 176938785 | 176938934 | DDX41  |
| chr5 | 176939090 | 176939213 | DDX41  |
| chr5 | 176939316 | 176939400 | DDX41  |
| chr5 | 176939490 | 176939652 | DDX41  |

|      |           |           |        |
|------|-----------|-----------|--------|
| chr5 | 176939774 | 176939883 | DDX41  |
| chr5 | 176940005 | 176940089 | DDX41  |
| chr5 | 176940347 | 176940491 | DDX41  |
| chr5 | 176940679 | 176940854 | DDX41  |
| chr5 | 176941695 | 176941844 | DDX41  |
| chr5 | 176941910 | 176942076 | DDX41  |
| chr5 | 176942180 | 176942265 | DDX41  |
| chr5 | 176942679 | 176942828 | DDX41  |
| chr5 | 176942923 | 176942996 | DDX41  |
| chr5 | 176943113 | 176943200 | DDX41  |
| chr5 | 176943282 | 176943454 | DDX41  |
| chr5 | 176943719 | 176943842 | DDX41  |
| chr5 | 176943913 | 176943952 | DDX41  |
| chr3 | 183371250 | 183371250 | FP SNP |
| chr1 | 189620278 | 189620278 | FP SNP |
| chr2 | 198266459 | 198266618 | SF3B1  |
| chr2 | 198266702 | 198266860 | SF3B1  |
| chr2 | 198267273 | 198267556 | SF3B1  |
| chr2 | 198267666 | 198267765 | SF3B1  |
| chr2 | 198268302 | 198268494 | SF3B1  |
| chr2 | 207041053 | 207041053 | FP SNP |
| chr2 | 209112993 | 209113390 | IDH1   |
| chr1 | 214962771 | 214962771 | FP SNP |
| chr2 | 232326417 | 232326417 | FP SNP |
| chr1 | 236700982 | 236700982 | FP SNP |
